# Supplementary material for: Identification of Potential Key lncRNAs and Genes Associated with Aging Based on Microarray Data of Adipocytes from Mice
Source: Biomed Res Int. 2016 Dec 21;2016:9181702. doi: 10.1155/2016/9181702 (PMC5209599; doi:10.1155/2016/9181702)
Supplement: Supplementary file 1 — The regulatory relationships between differentially time series expressed lncRNA genes and mRNA genes. [file 9181702.f1.xlsx]

## Sheet: 图2-pa-target
LncRNA	Target Gene	Pearson correlation coefficient	P-value
ENSMUSG00000020033	4930528A17Rik	0.960059	4.03183e-05
ENSMUSG00000020033	Alg12	-0.9538	6.66963e-05
ENSMUSG00000020033	Olfr1428	0.950284	8.59223e-05
ENSMUSG00000020033	Tssk1	0.960312	3.94437e-05
ENSMUSG00000020033	Zfp414	-0.955642	5.79527e-05
ENSMUSG00000021268	2310002L09Rik	-0.970872	1.34985e-05
ENSMUSG00000021268	4931406C07Rik	-0.961889	3.42768e-05
ENSMUSG00000021268	9230110C19Rik	-0.962158	3.34486e-05
ENSMUSG00000021268	9430016H08Rik	-0.954961	6.1082e-05
ENSMUSG00000021268	A930001N09Rik	-0.965064	2.53603e-05
ENSMUSG00000021268	Aard	-0.961002	3.71182e-05
ENSMUSG00000021268	Acaca	-0.954347	6.40113e-05
ENSMUSG00000021268	Acn9	-0.967846	1.90192e-05
ENSMUSG00000021268	Aim1	0.963133	3.05571e-05
ENSMUSG00000021268	Alcam	-0.970629	1.38932e-05
ENSMUSG00000021268	Alg8	-0.962709	3.179e-05
ENSMUSG00000021268	Alpk1	0.960593	3.84833e-05
ENSMUSG00000021268	Anapc11	0.971111	1.31165e-05
ENSMUSG00000021268	Ank2	-0.959458	4.24568e-05
ENSMUSG00000021268	Ap1s3	0.981197	2.94676e-06
ENSMUSG00000021268	Arhgap24	-0.960863	3.75805e-05
ENSMUSG00000021268	Armcx5	-0.959307	4.30085e-05
ENSMUSG00000021268	Cd3e	0.967546	1.96432e-05
ENSMUSG00000021268	Cic	0.959078	4.38527e-05
ENSMUSG00000021268	Clec7a	0.951479	7.89997e-05
ENSMUSG00000021268	Cox19	-0.955595	5.81625e-05
ENSMUSG00000021268	Csf2rb	0.959749	4.14129e-05
ENSMUSG00000021268	Cth	-0.973882	9.24214e-06
ENSMUSG00000021268	Cxcl16	0.9738	9.3423e-06
ENSMUSG00000021268	Dcun1d5	-0.965557	2.41404e-05
ENSMUSG00000021268	Ddx17	0.952837	7.1624e-05
ENSMUSG00000021268	Ddx3y	-0.965954	2.31912e-05
ENSMUSG00000021268	Decr1	-0.970038	1.48872e-05
ENSMUSG00000021268	Dgka	0.95473	6.21717e-05
ENSMUSG00000021268	Dnajc21	-0.951448	7.91723e-05
ENSMUSG00000021268	Dock9	0.952556	7.31061e-05
ENSMUSG00000021268	Dusp4	-0.958656	4.54351e-05
ENSMUSG00000021268	Echdc1	-0.959476	4.2392e-05
ENSMUSG00000021268	Eif2s3x	-0.953445	6.8485e-05
ENSMUSG00000021268	Fam83f	0.971603	1.23575e-05
ENSMUSG00000021268	Fasn	-0.963344	2.9955e-05
ENSMUSG00000021268	Fbxl4	-0.96303	3.08516e-05
ENSMUSG00000021268	Fes	0.966602	2.16945e-05
ENSMUSG00000021268	Fxr1	-0.976162	6.72788e-06
ENSMUSG00000021268	Galm	-0.950006	8.75907e-05
ENSMUSG00000021268	Ghr	-0.951854	7.69133e-05
ENSMUSG00000021268	Glrx	-0.952328	7.43288e-05
ENSMUSG00000021268	Hsdl2	-0.959675	4.1676e-05
ENSMUSG00000021268	Idh3a	-0.952095	7.55917e-05
ENSMUSG00000021268	Ina	-0.959875	4.09646e-05
ENSMUSG00000021268	Katnal2	-0.966204	2.26047e-05
ENSMUSG00000021268	Kctd12b	-0.958225	4.7093e-05
ENSMUSG00000021268	Lap3	-0.972936	1.04575e-05
ENSMUSG00000021268	Lias	-0.968976	1.67999e-05
ENSMUSG00000021268	Lpxn	0.96904	1.66807e-05
ENSMUSG00000021268	Lrrc39	-0.953901	6.61939e-05
ENSMUSG00000021268	Lrrfip1	0.960519	3.87346e-05
ENSMUSG00000021268	Lypla1	-0.964085	2.79075e-05
ENSMUSG00000021268	Lyplal1	-0.960593	3.84843e-05
ENSMUSG00000021268	Mdk	0.963778	2.87439e-05
ENSMUSG00000021268	Mme	-0.959422	4.25881e-05
ENSMUSG00000021268	Mrpl51	-0.964207	2.75826e-05
ENSMUSG00000021268	Mtch2	-0.9646	2.65472e-05
ENSMUSG00000021268	Myh9	0.968004	1.8697e-05
ENSMUSG00000021268	Ndufaf2	-0.955506	5.85663e-05
ENSMUSG00000021268	Ndufs1	-0.976845	6.08069e-06
ENSMUSG00000021268	Ngf	0.951546	7.86223e-05
ENSMUSG00000021268	Nln	-0.950589	8.41155e-05
ENSMUSG00000021268	Notch3	0.950038	8.73937e-05
ENSMUSG00000021268	Npr3	-0.979974	3.67e-06
ENSMUSG00000021268	Opa1	-0.973328	9.94014e-06
ENSMUSG00000021268	Oxsm	-0.96564	2.3941e-05
ENSMUSG00000021268	Parvb	0.963878	2.84708e-05
ENSMUSG00000021268	Pitpnc1	0.950457	8.48907e-05
ENSMUSG00000021268	Pkd1	0.95081	8.28217e-05
ENSMUSG00000021268	Plaa	-0.982692	2.20838e-06
ENSMUSG00000021268	Plekho2	0.954353	6.39785e-05
ENSMUSG00000021268	Ppargc1a	-0.963401	2.97931e-05
ENSMUSG00000021268	Ppp2r3c	-0.955067	6.05895e-05
ENSMUSG00000021268	Rabggtb	-0.965684	2.38333e-05
ENSMUSG00000021268	Rbm14	0.966671	2.15406e-05
ENSMUSG00000021268	Rft1	-0.955745	5.74855e-05
ENSMUSG00000021268	Rps6ka3	-0.96033	3.938e-05
ENSMUSG00000021268	Rrn3	-0.976851	6.07561e-06
ENSMUSG00000021268	Sc5d	-0.956586	5.37989e-05
ENSMUSG00000021268	Scoc	-0.959548	4.21342e-05
ENSMUSG00000021268	Secisbp2l	-0.955886	5.68544e-05
ENSMUSG00000021268	Sfrs18	0.950188	8.64929e-05
ENSMUSG00000021268	Sh2b3	0.961881	3.43028e-05
ENSMUSG00000021268	Snord15b	0.987218	7.67715e-07
ENSMUSG00000021268	Snord95	0.969993	1.49646e-05
ENSMUSG00000021268	Spry1	0.973717	9.4466e-06
ENSMUSG00000021268	Spry3	-0.965009	2.54997e-05
ENSMUSG00000021268	Srrm2	0.95649	5.4212e-05
ENSMUSG00000021268	St13	-0.956245	5.52727e-05
ENSMUSG00000021268	Suclg2	-0.962046	3.37901e-05
ENSMUSG00000021268	Tbc1d15	-0.968704	1.73169e-05
ENSMUSG00000021268	Tcf21	0.955227	5.98445e-05
ENSMUSG00000021268	Thoc3	-0.950755	8.31419e-05
ENSMUSG00000021268	Tlcd1	-0.952065	7.5756e-05
ENSMUSG00000021268	Tmed2	-0.956149	5.56915e-05
ENSMUSG00000021268	Tmem135	-0.98048	3.35711e-06
ENSMUSG00000021268	Tshr	-0.974951	7.99234e-06
ENSMUSG00000021268	Uba3	-0.952624	7.27447e-05
ENSMUSG00000021268	Uba7	0.970555	1.40148e-05
ENSMUSG00000021268	Ugp2	-0.962707	3.17976e-05
ENSMUSG00000021268	Usp14	-0.971559	1.24243e-05
ENSMUSG00000021268	Wdr93	-0.955731	5.75498e-05
ENSMUSG00000021268	Wt1	0.959215	4.33463e-05
ENSMUSG00000021874	Mif	-0.955343	5.93111e-05
ENSMUSG00000021874	Sos2	0.950603	8.40338e-05
ENSMUSG00000028475	Cox6b1	-0.965627	2.39708e-05
ENSMUSG00000028475	Ebp	-0.951447	7.91815e-05
ENSMUSG00000032048	2810008M24Rik	-0.967561	1.96111e-05
ENSMUSG00000032048	Acp2	-0.979492	3.98647e-06
ENSMUSG00000032048	Aff2	-0.960665	3.82419e-05
ENSMUSG00000032048	Agpat4	-0.95834	4.66488e-05
ENSMUSG00000032048	Becn1	-0.962627	3.20346e-05
ENSMUSG00000032048	C130026I21Rik	-0.953341	6.90129e-05
ENSMUSG00000032048	Cbara1	-0.988993	4.55758e-07
ENSMUSG00000032048	Cdk5	-0.955373	5.91749e-05
ENSMUSG00000032048	Copg	-0.966783	2.129e-05
ENSMUSG00000032048	Cux2	-0.959484	4.23652e-05
ENSMUSG00000032048	Dctn5	-0.95327	6.93771e-05
ENSMUSG00000032048	Ddah1	-0.950945	8.20432e-05
ENSMUSG00000032048	Ddx20	-0.963368	2.98876e-05
ENSMUSG00000032048	Dhdds	-0.95017	8.66e-05
ENSMUSG00000032048	Dock7	-0.950398	8.52394e-05
ENSMUSG00000032048	E030010A14Rik	0.957411	5.03466e-05
ENSMUSG00000032048	Epdr1	-0.974419	8.59772e-06
ENSMUSG00000032048	Exoc4	-0.964775	2.60938e-05
ENSMUSG00000032048	Fap	-0.950828	8.27202e-05
ENSMUSG00000032048	Fbxo25	-0.956778	5.29795e-05
ENSMUSG00000032048	Fgf1	-0.97721	5.75384e-06
ENSMUSG00000032048	Fig4	-0.954299	6.42428e-05
ENSMUSG00000032048	Fpgt	-0.978295	4.85622e-06
ENSMUSG00000032048	Gba	-0.961776	3.46302e-05
ENSMUSG00000032048	Gm10432	0.966264	2.24665e-05
ENSMUSG00000032048	Gm13154	-0.956957	5.22232e-05
ENSMUSG00000032048	Gm13926	0.966937	2.09506e-05
ENSMUSG00000032048	Gm4979	-0.959379	4.27446e-05
ENSMUSG00000032048	Gstm7	-0.958034	4.78429e-05
ENSMUSG00000032048	Gtf3c4	-0.951653	7.8026e-05
ENSMUSG00000032048	Hvcn1	-0.950418	8.51248e-05
ENSMUSG00000032048	Imp4	-0.977817	5.23808e-06
ENSMUSG00000032048	Klhdc5	-0.96201	3.39009e-05
ENSMUSG00000032048	Lgals8	-0.970874	1.3494e-05
ENSMUSG00000032048	Lman1	-0.965014	2.54861e-05
ENSMUSG00000032048	Lxn	-0.951644	7.80752e-05
ENSMUSG00000032048	Mtdh	-0.958101	4.75805e-05
ENSMUSG00000032048	Nedd1	-0.976156	6.73342e-06
ENSMUSG00000032048	Nr2c1	-0.961695	3.48857e-05
ENSMUSG00000032048	Nucks1	-0.969482	1.58679e-05
ENSMUSG00000032048	Olfr1373	0.95379	6.67484e-05
ENSMUSG00000032048	Pde7b	-0.963619	2.91841e-05
ENSMUSG00000032048	Phkg2	-0.954745	6.21001e-05
ENSMUSG00000032048	Polr1c	-0.97019	1.46267e-05
ENSMUSG00000032048	Polr3b	-0.963394	2.98141e-05
ENSMUSG00000032048	Rab27b	-0.977422	5.57021e-06
ENSMUSG00000032048	Rabgap1	-0.950765	8.30831e-05
ENSMUSG00000032048	Ranbp6	-0.982753	2.18135e-06
ENSMUSG00000032048	Rarres2	-0.967372	2.00106e-05
ENSMUSG00000032048	Rhbdd1	-0.959783	4.12932e-05
ENSMUSG00000032048	Rqcd1	-0.954199	6.4728e-05
ENSMUSG00000032048	Sash1	0.972273	1.13748e-05
ENSMUSG00000032048	Serpinb9	-0.963687	2.89961e-05
ENSMUSG00000032048	Slu7	-0.963756	2.88046e-05
ENSMUSG00000032048	Smc3	-0.950947	8.20279e-05
ENSMUSG00000032048	Smpd2	-0.964677	2.63461e-05
ENSMUSG00000032048	Tbc1d13	-0.956614	5.36793e-05
ENSMUSG00000032048	Tprkb	-0.960203	3.98179e-05
ENSMUSG00000032048	Ttc9c	-0.956153	5.5676e-05
ENSMUSG00000032048	Tubgcp2	-0.980873	3.12735e-06
ENSMUSG00000032048	Usp45	-0.95752	4.98997e-05
ENSMUSG00000032048	Vac14	-0.953473	6.83415e-05
ENSMUSG00000032048	Zfp192	-0.951194	8.06147e-05
ENSMUSG00000032048	Zfp426	-0.980842	3.14544e-06
ENSMUSG00000032048	Zfp81	-0.962261	3.31337e-05
ENSMUSG00000037982	1300014I06Rik	0.953605	6.7678e-05
ENSMUSG00000037982	A230046K03Rik	-0.95821	4.71524e-05
ENSMUSG00000037982	Abhd15	0.950582	8.41575e-05
ENSMUSG00000037982	Abi3	-0.962107	3.36039e-05
ENSMUSG00000037982	Acap2	-0.9699	1.51263e-05
ENSMUSG00000037982	Adamts1	0.95468	6.24084e-05
ENSMUSG00000037982	Adamts9	0.958816	4.48307e-05
ENSMUSG00000037982	Add1	-0.96967	1.55323e-05
ENSMUSG00000037982	Angptl4	0.950562	8.42739e-05
ENSMUSG00000037982	Ankfy1	-0.973195	1.01146e-05
ENSMUSG00000037982	Apol8	0.959913	4.08334e-05
ENSMUSG00000037982	Asah1	-0.970769	1.36644e-05
ENSMUSG00000037982	Baz1a	0.950468	8.48285e-05
ENSMUSG00000037982	Bckdhb	0.964562	2.66463e-05
ENSMUSG00000037982	Bloc1s2	-0.974494	8.51043e-06
ENSMUSG00000037982	C1qtnf7	-0.960791	3.78198e-05
ENSMUSG00000037982	Capzb	-0.950187	8.65012e-05
ENSMUSG00000037982	Casp2	-0.970136	1.47185e-05
ENSMUSG00000037982	Ccdc71	-0.952088	7.56263e-05
ENSMUSG00000037982	Ccdc80	0.96608	2.28944e-05
ENSMUSG00000037982	Cd9	-0.979622	3.89896e-06
ENSMUSG00000037982	Celsr2	0.994621	3.73825e-08
ENSMUSG00000037982	Chac1	0.955025	6.07859e-05
ENSMUSG00000037982	Chka	0.954106	6.51833e-05
ENSMUSG00000037982	Cpeb2	0.962635	3.20101e-05
ENSMUSG00000037982	Crkl	-0.967145	2.04975e-05
ENSMUSG00000037982	Cry2	0.966945	2.09319e-05
ENSMUSG00000037982	Csgalnact1	-0.969591	1.56732e-05
ENSMUSG00000037982	Csrnp1	0.950691	8.3518e-05
ENSMUSG00000037982	D10Ertd610e	-0.965394	2.45399e-05
ENSMUSG00000037982	Daglb	-0.968444	1.78208e-05
ENSMUSG00000037982	Dbnl	-0.971494	1.25234e-05
ENSMUSG00000037982	Ddx60	-0.973402	9.8447e-06
ENSMUSG00000037982	Derl1	0.971851	1.19877e-05
ENSMUSG00000037982	Dgat1	0.951442	7.92068e-05
ENSMUSG00000037982	Efr3a	0.969261	1.62701e-05
ENSMUSG00000037982	Egr1	0.952146	7.53152e-05
ENSMUSG00000037982	Fabp9	0.964589	2.65756e-05
ENSMUSG00000037982	Fam48a	-0.956285	5.50996e-05
ENSMUSG00000037982	Fbxo30	0.958411	4.63753e-05
ENSMUSG00000037982	Fdx1	0.965757	2.3659e-05
ENSMUSG00000037982	Fhl1	0.950129	8.68461e-05
ENSMUSG00000037982	Fut11	-0.973018	1.03479e-05
ENSMUSG00000037982	Gclc	0.959333	4.2914e-05
ENSMUSG00000037982	Gimap6	-0.964895	2.57886e-05
ENSMUSG00000037982	Gps2	-0.953913	6.61386e-05
ENSMUSG00000037982	Grhl1	0.961423	3.57516e-05
ENSMUSG00000037982	H2-DMb2	-0.960045	4.03685e-05
ENSMUSG00000037982	Homer1	0.959061	4.3914e-05
ENSMUSG00000037982	Ifit2	-0.962013	3.38943e-05
ENSMUSG00000037982	Insr	0.965128	2.51998e-05
ENSMUSG00000037982	Irak4	-0.960499	3.88045e-05
ENSMUSG00000037982	Islr	-0.965902	2.33138e-05
ENSMUSG00000037982	Klraq1	-0.971594	1.23707e-05
ENSMUSG00000037982	Ly6e	-0.955163	6.01441e-05
ENSMUSG00000037982	Lyn	-0.976413	6.48473e-06
ENSMUSG00000037982	Maf	-0.952379	7.40568e-05
ENSMUSG00000037982	Maff	0.951319	7.99032e-05
ENSMUSG00000037982	Magi3	0.954886	6.14343e-05
ENSMUSG00000037982	Man1a	-0.96343	2.97121e-05
ENSMUSG00000037982	Mlf1ip	0.960673	3.8216e-05
ENSMUSG00000037982	Mmp23	-0.978663	4.57607e-06
ENSMUSG00000037982	Mrpl38	0.964282	2.73812e-05
ENSMUSG00000037982	Myc	0.952983	7.08612e-05
ENSMUSG00000037982	Naip2	-0.976495	6.40704e-06
ENSMUSG00000037982	Nfil3	0.95086	8.25334e-05
ENSMUSG00000037982	Nr1d1	0.955885	5.68608e-05
ENSMUSG00000037982	Nrip1	0.959037	4.40021e-05
ENSMUSG00000037982	Ophn1	0.954948	6.11437e-05
ENSMUSG00000037982	Pde12	0.965759	2.36536e-05
ENSMUSG00000037982	Pde2a	-0.953871	6.63437e-05
ENSMUSG00000037982	Pea15a	-0.965969	2.31545e-05
ENSMUSG00000037982	Pid1	-0.950404	8.52092e-05
ENSMUSG00000037982	Pkp2	0.954954	6.11178e-05
ENSMUSG00000037982	Plekha1	-0.955136	6.02691e-05
ENSMUSG00000037982	Plekhb2	-0.966563	2.17841e-05
ENSMUSG00000037982	Popdc2	0.967385	1.99828e-05
ENSMUSG00000037982	Psd4	-0.970233	1.45537e-05
ENSMUSG00000037982	Psmb9	-0.953799	6.67022e-05
ENSMUSG00000037982	Ptpn2	0.951258	8.02488e-05
ENSMUSG00000037982	Rai14	-0.976047	6.84157e-06
ENSMUSG00000037982	Rbm41	-0.965991	2.31031e-05
ENSMUSG00000037982	Rnf166	-0.973874	9.25084e-06
ENSMUSG00000037982	Sepp1	-0.967115	2.05617e-05
ENSMUSG00000037982	2016-09-08	-0.950857	8.25522e-05
ENSMUSG00000037982	Serping1	-0.973058	1.02944e-05
ENSMUSG00000037982	Spcs3	-0.964934	2.56894e-05
ENSMUSG00000037982	Stk4	-0.960695	3.81422e-05
ENSMUSG00000037982	Tiparp	0.950063	8.72433e-05
ENSMUSG00000037982	Tirap	-0.962604	3.21014e-05
ENSMUSG00000037982	Tnfrsf12a	0.966232	2.25404e-05
ENSMUSG00000037982	Trib1	0.956751	5.30937e-05
ENSMUSG00000037982	Trim12a	-0.969338	1.61297e-05
ENSMUSG00000037982	Trp53inp1	-0.980437	3.383e-06
ENSMUSG00000037982	Txlna	-0.950343	8.55712e-05
ENSMUSG00000037982	Vav3	-0.959135	4.36385e-05
ENSMUSG00000037982	Zfp187	-0.968417	1.78738e-05
ENSMUSG00000037982	Zfp281	0.953691	6.72452e-05
ENSMUSG00000037982	Zfp36	0.961807	3.4535e-05
ENSMUSG00000037982	Zfp90	-0.958607	4.56229e-05
ENSMUSG00000038152	1110001A16Rik	0.950139	8.67897e-05
ENSMUSG00000038152	Mapk7	-0.976941	5.99372e-06
ENSMUSG00000038152	Zfp746	-0.9538	6.66958e-05
ENSMUSG00000044471	1810013D10Rik	-0.962858	3.13515e-05
ENSMUSG00000044471	Atp5h	-0.962947	3.10937e-05
ENSMUSG00000044471	Cox7b	-0.969654	1.55601e-05
ENSMUSG00000044471	Dda1	-0.955739	5.75118e-05
ENSMUSG00000044471	Lepre1	-0.952471	7.35609e-05
ENSMUSG00000044471	Letm1	-0.954477	6.33797e-05
ENSMUSG00000044471	Mcee	-0.953713	6.71351e-05
ENSMUSG00000044471	Mecr	-0.953315	6.91503e-05
ENSMUSG00000044471	Mrpl27	-0.959307	4.30078e-05
ENSMUSG00000044471	Peo1	-0.96257	3.22029e-05
ENSMUSG00000044471	Prorsd1	-0.955424	5.89403e-05
ENSMUSG00000044471	Rapgef3	0.951441	7.92125e-05
ENSMUSG00000044471	Slc25a43	0.976003	6.88538e-06
ENSMUSG00000044471	Tceb3	-0.952817	7.17287e-05
ENSMUSG00000046005	Ephb3	-0.966781	2.12945e-05
ENSMUSG00000046463	1700021K19Rik	0.9626	3.21138e-05
ENSMUSG00000046463	Ampd1	-0.951888	7.67226e-05
ENSMUSG00000046463	AU021092	0.970195	1.46186e-05
ENSMUSG00000046463	Cldn10	0.969845	1.52221e-05
ENSMUSG00000046463	Clic6	0.962516	3.23652e-05
ENSMUSG00000046463	Fmo3	0.969762	1.53683e-05
ENSMUSG00000046463	Fubp3	0.954792	6.18781e-05
ENSMUSG00000046463	Gm10521	0.954129	6.50703e-05
ENSMUSG00000046463	Pacsin2	0.957356	5.05717e-05
ENSMUSG00000046463	Ptgis	0.954205	6.46983e-05
ENSMUSG00000046463	Sh3d19	0.983764	1.76732e-06
ENSMUSG00000046463	Slc35f2	0.963658	2.90754e-05
ENSMUSG00000046463	Tspan15	0.958822	4.48083e-05
ENSMUSG00000048824	Cln8	-0.9543	6.4239e-05
ENSMUSG00000048824	Col6a3	-0.956489	5.42149e-05
ENSMUSG00000048824	Lhx1	0.954117	6.51289e-05
ENSMUSG00000048824	Slc25a37	-0.954722	6.22129e-05
ENSMUSG00000050538	Bbs7	0.964751	2.61563e-05
ENSMUSG00000050538	Cdc42bpb	-0.959721	4.15118e-05
ENSMUSG00000050538	Hn1	-0.95042	8.51099e-05
ENSMUSG00000050538	Itfg3	-0.954399	6.37568e-05
ENSMUSG00000050538	Mn1	-0.953122	7.0142e-05
ENSMUSG00000050538	Ndfip1	-0.976233	6.6586e-06
ENSMUSG00000050538	Slc15a5	0.956746	5.3115e-05
ENSMUSG00000050538	Zdhhc8	-0.968708	1.73089e-05
ENSMUSG00000050538	Zscan4-ps2	0.962692	3.18423e-05
ENSMUSG00000053117	2010110P09Rik	0.950889	8.23643e-05
ENSMUSG00000053117	4930506M07Rik	0.951552	7.85921e-05
ENSMUSG00000053117	A630001G21Rik	0.965239	2.49216e-05
ENSMUSG00000053117	Abhd5	-0.955312	5.94543e-05
ENSMUSG00000053117	Acox1	-0.9546	6.27909e-05
ENSMUSG00000053117	Acsm3	-0.95327	6.93793e-05
ENSMUSG00000053117	Adssl1	0.95578	5.73283e-05
ENSMUSG00000053117	Aldh1a2	0.952347	7.42239e-05
ENSMUSG00000053117	Aldh1a3	0.950068	8.72121e-05
ENSMUSG00000053117	Ap2m1	0.965523	2.42229e-05
ENSMUSG00000053117	Arc	-0.957458	5.0155e-05
ENSMUSG00000053117	Arhgap25	0.954365	6.39229e-05
ENSMUSG00000053117	Bmf	0.95113	8.09769e-05
ENSMUSG00000053117	Cabin1	0.954258	6.44436e-05
ENSMUSG00000053117	Ccr5	0.9563	5.50323e-05
ENSMUSG00000053117	Cd19	0.961318	3.60883e-05
ENSMUSG00000053117	Cd200r1	0.987637	6.8342e-07
ENSMUSG00000053117	Cd22	0.974458	8.55226e-06
ENSMUSG00000053117	Cd300lb	0.957862	4.85256e-05
ENSMUSG00000053117	Cd52	0.953375	6.88414e-05
ENSMUSG00000053117	Cdan1	0.95604	5.61742e-05
ENSMUSG00000053117	Cklf	0.988969	4.59237e-07
ENSMUSG00000053117	Clec4a2	0.958723	4.51816e-05
ENSMUSG00000053117	Col1a2	0.954695	6.23412e-05
ENSMUSG00000053117	Coro7	0.966375	2.22107e-05
ENSMUSG00000053117	Crlf3	0.957583	4.96453e-05
ENSMUSG00000053117	Csf2ra	0.954773	6.19714e-05
ENSMUSG00000053117	Csk	0.956414	5.45377e-05
ENSMUSG00000053117	Ctsz	0.961111	3.67603e-05
ENSMUSG00000053117	Cybasc3	0.959375	4.27606e-05
ENSMUSG00000053117	Dcaf7	0.973805	9.33701e-06
ENSMUSG00000053117	Dpep2	0.955587	5.81989e-05
ENSMUSG00000053117	Dusp7	0.956761	5.30521e-05
ENSMUSG00000053117	Evi2a	0.95883	4.4779e-05
ENSMUSG00000053117	Fkbp15	0.97521	7.70861e-06
ENSMUSG00000053117	Gba2	0.962304	3.30033e-05
ENSMUSG00000053117	Gcnt1	0.982567	2.26451e-06
ENSMUSG00000053117	Gimap1	0.972639	1.08618e-05
ENSMUSG00000053117	Gm10808	-0.972665	1.08253e-05
ENSMUSG00000053117	Gm9900	0.951345	7.97566e-05
ENSMUSG00000053117	Gmip	0.95909	4.38068e-05
ENSMUSG00000053117	Got1	0.957545	4.97995e-05
ENSMUSG00000053117	Gpd2	-0.962608	3.209e-05
ENSMUSG00000053117	Hint2	-0.979243	4.15739e-06
ENSMUSG00000053117	Hpcal1	0.950119	8.69056e-05
ENSMUSG00000053117	Igj	0.955252	5.97287e-05
ENSMUSG00000053117	Igk-V1	0.974848	8.10743e-06
ENSMUSG00000053117	Il10rb	0.985245	1.26639e-06
ENSMUSG00000053117	Il2rb	0.958226	4.70918e-05
ENSMUSG00000053117	Il33	0.955051	6.06652e-05
ENSMUSG00000053117	Irs1	-0.950145	8.67506e-05
ENSMUSG00000053117	Klb	-0.966993	2.08275e-05
ENSMUSG00000053117	Klhl6	0.951007	8.16838e-05
ENSMUSG00000053117	Lum	0.970957	1.33608e-05
ENSMUSG00000053117	Ly9	0.970485	1.41303e-05
ENSMUSG00000053117	Man1c1	0.953217	6.96494e-05
ENSMUSG00000053117	Meox2	0.967927	1.88534e-05
ENSMUSG00000053117	Mfsd6	0.954112	6.51558e-05
ENSMUSG00000053117	Mir22	-0.96161	3.51538e-05
ENSMUSG00000053117	Mpp6	0.960241	3.96863e-05
ENSMUSG00000053117	Ms4a1	0.966835	2.11757e-05
ENSMUSG00000053117	Mtmr12	0.951769	7.73796e-05
ENSMUSG00000053117	Myct1	0.967244	2.02829e-05
ENSMUSG00000053117	Myo1f	0.963691	2.89849e-05
ENSMUSG00000053117	Naip5	0.977226	5.73968e-06
ENSMUSG00000053117	Naip6	0.974473	8.53483e-06
ENSMUSG00000053117	Nceh1	0.951598	7.83299e-05
ENSMUSG00000053117	Ndst2	0.957214	5.11566e-05
ENSMUSG00000053117	Nfxl1	0.958965	4.42695e-05
ENSMUSG00000053117	Nr1h4	0.95151	7.88264e-05
ENSMUSG00000053117	Obfc2a	-0.963651	2.90947e-05
ENSMUSG00000053117	Optc	-0.961168	3.65743e-05
ENSMUSG00000053117	P2rx4	0.953901	6.61957e-05
ENSMUSG00000053117	Pak1	0.971888	1.19318e-05
ENSMUSG00000053117	Phldb2	0.951448	7.9174e-05
ENSMUSG00000053117	Pigl	-0.955114	6.03706e-05
ENSMUSG00000053117	Pik3ap1	0.96533	2.46974e-05
ENSMUSG00000053117	Pik3cg	0.960683	3.81814e-05
ENSMUSG00000053117	Pkn1	0.953818	6.66109e-05
ENSMUSG00000053117	Plagl1	-0.951827	7.7058e-05
ENSMUSG00000053117	Pou2af1	0.952277	7.4602e-05
ENSMUSG00000053117	Ppargc1b	-0.963113	3.06133e-05
ENSMUSG00000053117	Prkd2	0.960934	3.73436e-05
ENSMUSG00000053117	Ptpn6	0.957019	5.19636e-05
ENSMUSG00000053117	Ranbp9	-0.953016	7.06891e-05
ENSMUSG00000053117	Rasa4	0.962579	3.21746e-05
ENSMUSG00000053117	Rhog	0.968802	1.71294e-05
ENSMUSG00000053117	Rpl10	0.950159	8.66648e-05
ENSMUSG00000053117	2016-09-11	0.958369	4.65349e-05
ENSMUSG00000053117	Sipa1	0.963984	2.81809e-05
ENSMUSG00000053117	Six2	-0.961228	3.63813e-05
ENSMUSG00000053117	Sla	0.9567	5.33101e-05
ENSMUSG00000053117	Slc37a2	0.963563	2.93392e-05
ENSMUSG00000053117	Slc6a6	0.972489	1.10692e-05
ENSMUSG00000053117	Smap2	0.980216	3.5175e-06
ENSMUSG00000053117	Snai2	0.957644	4.9399e-05
ENSMUSG00000053117	Snx5	0.970045	1.48757e-05
ENSMUSG00000053117	Spib	0.987892	6.35615e-07
ENSMUSG00000053117	St8sia4	0.965473	2.43458e-05
ENSMUSG00000053117	Stat4	0.958406	4.6394e-05
ENSMUSG00000053117	Steap3	0.955362	5.92229e-05
ENSMUSG00000053117	Tbc1d1	0.982973	2.08601e-06
ENSMUSG00000053117	Tbc1d4	-0.968613	1.74917e-05
ENSMUSG00000053117	Tmsb10	0.962615	3.20702e-05
ENSMUSG00000053117	Trim3	0.962336	3.29052e-05
ENSMUSG00000053117	Vsig4	0.950455	8.49069e-05
ENSMUSG00000053117	Wdr82	0.962503	3.24017e-05
ENSMUSG00000053117	Zfp710	0.976211	6.68004e-06
ENSMUSG00000053656	Adam30	-0.967152	2.0482e-05
ENSMUSG00000053656	Cbx7	0.953975	6.58307e-05
ENSMUSG00000053656	Dlgap4	0.960882	3.75153e-05
ENSMUSG00000053656	Efnb2	0.958059	4.77449e-05
ENSMUSG00000053656	Fam54a	-0.958227	4.70879e-05
ENSMUSG00000053656	Gm10694	-0.955565	5.82983e-05
ENSMUSG00000053656	Gm11711	0.950193	8.64645e-05
ENSMUSG00000053656	Ifi205	0.971761	1.21202e-05
ENSMUSG00000053656	Il17rd	0.954319	6.41438e-05
ENSMUSG00000053656	Ldb1	0.956401	5.45962e-05
ENSMUSG00000053656	Mllt4	0.956965	5.21927e-05
ENSMUSG00000053656	Papln	0.962926	3.11541e-05
ENSMUSG00000053656	Pnpla6	0.966256	2.24846e-05
ENSMUSG00000053656	Rps4y2	-0.953563	6.78891e-05
ENSMUSG00000053957	Cobl	0.96092	3.73913e-05
ENSMUSG00000053957	Gm8675	-0.954608	6.27557e-05
ENSMUSG00000053957	Hscb	-0.950003	8.76055e-05
ENSMUSG00000053957	Il18bp	0.954711	6.22627e-05
ENSMUSG00000053957	Morn2	-0.962407	3.26926e-05
ENSMUSG00000053957	Nek6	-0.950861	8.25262e-05
ENSMUSG00000053957	R3hcc1	-0.958732	4.51455e-05
ENSMUSG00000053957	Upf3a	-0.963057	3.07759e-05
ENSMUSG00000054135	0610009B22Rik	-0.960358	3.92845e-05
ENSMUSG00000054135	1110002N22Rik	-0.953807	6.6664e-05
ENSMUSG00000054135	2900010J23Rik	-0.957847	4.85854e-05
ENSMUSG00000054135	Acsf2	-0.966931	2.09627e-05
ENSMUSG00000054135	Adap1	-0.951301	8.00023e-05
ENSMUSG00000054135	Aldh4a1	-0.96704	2.07251e-05
ENSMUSG00000054135	Amz2	-0.951748	7.74997e-05
ENSMUSG00000054135	C130074G19Rik	-0.957125	5.15247e-05
ENSMUSG00000054135	Clca5	0.964156	2.77185e-05
ENSMUSG00000054135	Dap3	-0.969235	1.63176e-05
ENSMUSG00000054135	Dnajc15	-0.951204	8.05554e-05
ENSMUSG00000054135	Etfb	-0.963459	2.96293e-05
ENSMUSG00000054135	Faf1	-0.976941	5.99366e-06
ENSMUSG00000054135	Gm10158	0.960072	4.02759e-05
ENSMUSG00000054135	Gm10456	0.958025	4.78787e-05
ENSMUSG00000054135	Golt1b	-0.954434	6.35867e-05
ENSMUSG00000054135	Igsf3	0.981617	2.72419e-06
ENSMUSG00000054135	Kpna4	-0.952679	7.24546e-05
ENSMUSG00000054135	Lonp2	-0.954392	6.37898e-05
ENSMUSG00000054135	Nek6	-0.958652	4.54503e-05
ENSMUSG00000054135	Pik3c2b	0.951823	7.70831e-05
ENSMUSG00000054135	Psmb4	-0.950919	8.2192e-05
ENSMUSG00000054135	Psmd3	-0.970249	1.45273e-05
ENSMUSG00000054135	Ptges2	-0.95624	5.52958e-05
ENSMUSG00000054135	R3hcc1	-0.974064	9.01942e-06
ENSMUSG00000054135	Rai2	-0.96845	1.78093e-05
ENSMUSG00000054135	Rasgrf2	-0.950975	8.18672e-05
ENSMUSG00000054135	Rsph3a	-0.955109	6.03919e-05
ENSMUSG00000054135	Rxrg	-0.957593	4.96054e-05
ENSMUSG00000054135	Tmem44	0.973843	9.28906e-06
ENSMUSG00000054135	Tnfrsf25	0.952115	7.54804e-05
ENSMUSG00000054135	Upf3a	-0.988526	5.26801e-07
ENSMUSG00000054135	Usp54	0.952115	7.54837e-05
ENSMUSG00000054135	Zdhhc20	0.959048	4.3963e-05
ENSMUSG00000054618	Frzb	-0.953261	6.9424e-05
ENSMUSG00000055972	Cables2	-0.962926	3.11537e-05
ENSMUSG00000056145	Gm1077	0.967857	1.89965e-05
ENSMUSG00000056145	Sh3bp2	0.961498	3.5511e-05
ENSMUSG00000056145	Spon1	0.96023	3.97267e-05
ENSMUSG00000056145	Zfp691	0.958262	4.6949e-05
ENSMUSG00000056699	0610011L14Rik	-0.950475	8.47883e-05
ENSMUSG00000056699	Chkb	-0.961732	3.47681e-05
ENSMUSG00000056699	Gm26	0.963256	3.02036e-05
ENSMUSG00000056716	1700049E17Rik1	0.959054	4.39405e-05
ENSMUSG00000056716	2900010M23Rik	-0.963089	3.06829e-05
ENSMUSG00000056716	3110048L19Rik	-0.954052	6.54497e-05
ENSMUSG00000056716	Atg14	-0.951205	8.05514e-05
ENSMUSG00000056716	Gm807	0.956209	5.54291e-05
ENSMUSG00000056716	Hhipl2	0.958996	4.41559e-05
ENSMUSG00000056716	Ism2	0.953147	7.00091e-05
ENSMUSG00000056716	Map2k1	-0.976352	6.54277e-06
ENSMUSG00000056716	Mark3	-0.96586	2.34134e-05
ENSMUSG00000056716	Med6	-0.955651	5.79083e-05
ENSMUSG00000056716	Phkg2	-0.952043	7.58766e-05
ENSMUSG00000056716	Ppp2r5c	-0.967206	2.0366e-05
ENSMUSG00000056716	Tprkb	-0.972677	1.08099e-05
ENSMUSG00000056716	Vti1a	-0.961738	3.47509e-05
ENSMUSG00000056716	Zfp110	-0.959303	4.3023e-05
ENSMUSG00000056716	Zfp148	-0.952883	7.13855e-05
ENSMUSG00000059244	Pja1	-0.983598	1.83131e-06
ENSMUSG00000059244	Sap30	-0.961124	3.67189e-05
ENSMUSG00000061510	1110036O03Rik	0.955114	6.03682e-05
ENSMUSG00000061510	1300010F03Rik	-0.953002	7.07602e-05
ENSMUSG00000061510	2010110P09Rik	0.950479	8.47639e-05
ENSMUSG00000061510	2900073G15Rik	-0.986779	8.63788e-07
ENSMUSG00000061510	4930466F19Rik	0.957485	5.00421e-05
ENSMUSG00000061510	4930518I15Rik	0.961761	3.46794e-05
ENSMUSG00000061510	4933409K07Rik	0.957636	4.943e-05
ENSMUSG00000061510	9930111J21Rik2	0.959308	4.30056e-05
ENSMUSG00000061510	A4galt	0.97111	1.3119e-05
ENSMUSG00000061510	A730017L22Rik	0.955523	5.84892e-05
ENSMUSG00000061510	Abca6	0.978853	4.43523e-06
ENSMUSG00000061510	Abca8a	0.962983	3.09891e-05
ENSMUSG00000061510	Abca9	0.962148	3.34763e-05
ENSMUSG00000061510	Acadvl	-0.951955	7.63535e-05
ENSMUSG00000061510	Ace	0.973956	9.15057e-06
ENSMUSG00000061510	Acyp2	-0.951918	7.65587e-05
ENSMUSG00000061510	Adamtsl5	0.974003	9.09324e-06
ENSMUSG00000061510	Afap1	-0.959801	4.12283e-05
ENSMUSG00000061510	Agtrap	0.97002	1.49185e-05
ENSMUSG00000061510	Aifm1	-0.964689	2.63164e-05
ENSMUSG00000061510	Airn	0.955668	5.78355e-05
ENSMUSG00000061510	Amy1	-0.953012	7.07114e-05
ENSMUSG00000061510	Ano1	0.972986	1.03906e-05
ENSMUSG00000061510	Antxr1	0.954407	6.37201e-05
ENSMUSG00000061510	Antxr2	0.968187	1.83293e-05
ENSMUSG00000061510	Anxa3	0.957671	4.92885e-05
ENSMUSG00000061510	Arhgef3	0.969256	1.62805e-05
ENSMUSG00000061510	Arih2	-0.961099	3.67995e-05
ENSMUSG00000061510	Aspn	0.966017	2.30412e-05
ENSMUSG00000061510	Atp5l	-0.970294	1.44499e-05
ENSMUSG00000061510	Avpr1a	0.958684	4.53276e-05
ENSMUSG00000061510	Axl	0.951429	7.92787e-05
ENSMUSG00000061510	Bank1	0.956483	5.42414e-05
ENSMUSG00000061510	BC088983	-0.986917	8.32772e-07
ENSMUSG00000061510	Bcl6	-0.962981	3.0995e-05
ENSMUSG00000061510	Bnc1	0.965785	2.35924e-05
ENSMUSG00000061510	Brd2	-0.969776	1.53437e-05
ENSMUSG00000061510	Btbd3	0.950427	8.50702e-05
ENSMUSG00000061510	C7	0.984952	1.3564e-06
ENSMUSG00000061510	Cacng7	-0.972757	1.06997e-05
ENSMUSG00000061510	Camk1d	0.951504	7.88576e-05
ENSMUSG00000061510	Car7	0.954643	6.25859e-05
ENSMUSG00000061510	Cass4	0.962187	3.33573e-05
ENSMUSG00000061510	Ccbl2	-0.982733	2.19006e-06
ENSMUSG00000061510	Ccbp2	0.971005	1.32854e-05
ENSMUSG00000061510	Ccl2	-0.956197	5.54849e-05
ENSMUSG00000061510	Ccl8	0.962232	3.32206e-05
ENSMUSG00000061510	Cct7	-0.950971	8.18919e-05
ENSMUSG00000061510	Cd109	0.96332	3.00234e-05
ENSMUSG00000061510	Cd2	0.955898	5.68029e-05
ENSMUSG00000061510	Cd209d	0.968104	1.84948e-05
ENSMUSG00000061510	Cd209f	0.978143	4.97552e-06
ENSMUSG00000061510	Cd209g	0.970603	1.39354e-05
ENSMUSG00000061510	Cd2ap	0.950177	8.65596e-05
ENSMUSG00000061510	Cdc42se2	0.960353	3.93005e-05
ENSMUSG00000061510	Cdkl2	-0.951157	8.08223e-05
ENSMUSG00000061510	Cdon	0.960416	3.90848e-05
ENSMUSG00000061510	Cebpb	-0.956938	5.23042e-05
ENSMUSG00000061510	Cfh	0.964562	2.66458e-05
ENSMUSG00000061510	Chst11	-0.958198	4.72004e-05
ENSMUSG00000061510	Clpx	-0.960791	3.78183e-05
ENSMUSG00000061510	Cma1	0.959603	4.19354e-05
ENSMUSG00000061510	Col14a1	0.951439	7.92254e-05
ENSMUSG00000061510	Cpa3	0.955719	5.76035e-05
ENSMUSG00000061510	Crip1	0.963212	3.03288e-05
ENSMUSG00000061510	Ctage5	-0.981631	2.71698e-06
ENSMUSG00000061510	Cxcl10	-0.978069	5.03401e-06
ENSMUSG00000061510	Cxcl9	-0.969261	1.62708e-05
ENSMUSG00000061510	Cxcr3	0.97335	9.91255e-06
ENSMUSG00000061510	Cyb561d1	0.984966	1.35195e-06
ENSMUSG00000061510	Cysltr1	0.957725	4.90715e-05
ENSMUSG00000061510	Dbn1	0.952434	7.37604e-05
ENSMUSG00000061510	Dcn	0.965232	2.49402e-05
ENSMUSG00000061510	Ddah2	0.951886	7.67379e-05
ENSMUSG00000061510	Ddr2	0.977828	5.22948e-06
ENSMUSG00000061510	Dennd4c	0.96234	3.28946e-05
ENSMUSG00000061510	Dlg4	0.974935	8.00972e-06
ENSMUSG00000061510	Dnaja3	-0.979022	4.31358e-06
ENSMUSG00000061510	Dnajb14	-0.984976	1.34876e-06
ENSMUSG00000061510	Dpep1	0.973733	9.42635e-06
ENSMUSG00000061510	Dpp4	0.979679	3.86108e-06
ENSMUSG00000061510	Edn1	0.976518	6.38523e-06
ENSMUSG00000061510	Efemp2	0.959488	4.23493e-05
ENSMUSG00000061510	Efhd1	0.972207	1.1469e-05
ENSMUSG00000061510	Ehd4	0.956164	5.5626e-05
ENSMUSG00000061510	Eif4e3	-0.969436	1.59521e-05
ENSMUSG00000061510	Ell2	-0.956918	5.23911e-05
ENSMUSG00000061510	Endou	-0.952933	7.11233e-05
ENSMUSG00000061510	Enpp3	0.981669	2.69714e-06
ENSMUSG00000061510	Eny2	-0.954128	6.50774e-05
ENSMUSG00000061510	Ephx3	0.954548	6.30406e-05
ENSMUSG00000061510	Etf1	-0.962916	3.11834e-05
ENSMUSG00000061510	Etfa	-0.96261	3.20826e-05
ENSMUSG00000061510	Etv1	0.951976	7.62433e-05
ENSMUSG00000061510	Ezr	0.958988	4.4186e-05
ENSMUSG00000061510	F3	-0.983947	1.69907e-06
ENSMUSG00000061510	Fam174a	-0.953244	6.95121e-05
ENSMUSG00000061510	Fam180a	0.950232	8.62276e-05
ENSMUSG00000061510	Fas	-0.954176	6.484e-05
ENSMUSG00000061510	Fbln5	0.963704	2.89469e-05
ENSMUSG00000061510	Fgf18	0.967247	2.02773e-05
ENSMUSG00000061510	Fgl1	-0.965124	2.52082e-05
ENSMUSG00000061510	Fkbp10	0.952441	7.37221e-05
ENSMUSG00000061510	Flrt2	0.987334	7.4369e-07
ENSMUSG00000061510	Flt3l	0.95788	4.84546e-05
ENSMUSG00000061510	Fmod	0.952752	7.20715e-05
ENSMUSG00000061510	Fos	-0.96044	3.90035e-05
ENSMUSG00000061510	Foxred2	0.968977	1.67973e-05
ENSMUSG00000061510	Gabra3	0.951969	7.62818e-05
ENSMUSG00000061510	Gadd45a	-0.984588	1.47423e-06
ENSMUSG00000061510	Gadd45b	-0.96633	2.23147e-05
ENSMUSG00000061510	Gadd45g	-0.971795	1.20705e-05
ENSMUSG00000061510	Galnt2	-0.985727	1.12809e-06
ENSMUSG00000061510	Gars	-0.985925	1.07442e-06
ENSMUSG00000061510	Gas1	0.961257	3.62856e-05
ENSMUSG00000061510	Gbgt1	0.986412	9.5017e-07
ENSMUSG00000061510	Gclm	-0.951968	7.62836e-05
ENSMUSG00000061510	Gja5	0.95754	4.98211e-05
ENSMUSG00000061510	Gm10046	0.962355	3.28474e-05
ENSMUSG00000061510	Gm16848	0.972896	1.05116e-05
ENSMUSG00000061510	Gpc4	-0.956479	5.42566e-05
ENSMUSG00000061510	Gpr21	0.960664	3.82441e-05
ENSMUSG00000061510	Grap	0.95596	5.65292e-05
ENSMUSG00000061510	Hibch	-0.955005	6.08777e-05
ENSMUSG00000061510	Hic1	0.951063	8.13638e-05
ENSMUSG00000061510	Hmox1	-0.961556	3.53246e-05
ENSMUSG00000061510	Hspd1	-0.971188	1.2996e-05
ENSMUSG00000061510	Ier5	-0.952878	7.14092e-05
ENSMUSG00000061510	Ifitm3	0.955137	6.02634e-05
ENSMUSG00000061510	Il16	0.979082	4.27035e-06
ENSMUSG00000061510	Inpp4a	0.970914	1.34301e-05
ENSMUSG00000061510	Irak1bp1	-0.962237	3.32046e-05
ENSMUSG00000061510	Itga11	0.950042	8.7374e-05
ENSMUSG00000061510	Itgb1bp1	-0.981027	3.04078e-06
ENSMUSG00000061510	Itgbl1	0.961735	3.4761e-05
ENSMUSG00000061510	Itpr3	0.968561	1.75921e-05
ENSMUSG00000061510	Katna1	-0.972356	1.12561e-05
ENSMUSG00000061510	Kcnab1	0.970178	1.46466e-05
ENSMUSG00000061510	Kcnt2	0.962053	3.377e-05
ENSMUSG00000061510	Klhl12	-0.957241	5.1044e-05
ENSMUSG00000061510	Krt19	0.95889	4.45521e-05
ENSMUSG00000061510	Lgi2	0.952508	7.33631e-05
ENSMUSG00000061510	Lgi4	0.963388	2.98289e-05
ENSMUSG00000061510	Limk1	0.969753	1.53837e-05
ENSMUSG00000061510	Loxl1	0.974911	8.03705e-06
ENSMUSG00000061510	Lrig1	-0.961941	3.4117e-05
ENSMUSG00000061510	Ly6a	0.970853	1.35285e-05
ENSMUSG00000061510	Lyrm5	-0.953646	6.74712e-05
ENSMUSG00000061510	2016-03-03	-0.958901	4.45091e-05
ENSMUSG00000061510	Mast3	0.951053	8.14197e-05
ENSMUSG00000061510	Mcc	0.958714	4.52168e-05
ENSMUSG00000061510	Mccc2	-0.971237	1.29191e-05
ENSMUSG00000061510	Mcpt4	0.950688	8.35338e-05
ENSMUSG00000061510	Mef2c	0.969878	1.51656e-05
ENSMUSG00000061510	Mfap5	0.955966	5.65017e-05
ENSMUSG00000061510	Mkl2	0.957884	4.84372e-05
ENSMUSG00000061510	Mmp11	0.966151	2.27275e-05
ENSMUSG00000061510	Mmp14	0.954855	6.15816e-05
ENSMUSG00000061510	Ms4a4d	0.956103	5.58972e-05
ENSMUSG00000061510	Ms4a8a	0.978319	4.8375e-06
ENSMUSG00000061510	Mtmr11	0.959318	4.29675e-05
ENSMUSG00000061510	Naaladl2	0.957501	4.99776e-05
ENSMUSG00000061510	Nav3	-0.974125	8.94635e-06
ENSMUSG00000061510	Nkain4	0.960778	3.78613e-05
ENSMUSG00000061510	Nop58	-0.965458	2.43822e-05
ENSMUSG00000061510	Nova1	0.976196	6.6946e-06
ENSMUSG00000061510	Npy1r	0.959231	4.32851e-05
ENSMUSG00000061510	Ntn4	0.952341	7.42567e-05
ENSMUSG00000061510	Nxph1	0.952756	7.2052e-05
ENSMUSG00000061510	Oasl2	0.960685	3.81732e-05
ENSMUSG00000061510	Osr1	0.963833	2.85925e-05
ENSMUSG00000061510	Pamr1	0.967467	1.98084e-05
ENSMUSG00000061510	Pcdh18	0.962274	3.30944e-05
ENSMUSG00000061510	Pcolce	0.961079	3.68665e-05
ENSMUSG00000061510	Pdcd11	0.951259	8.02427e-05
ENSMUSG00000061510	Pdgfra	0.950298	8.58372e-05
ENSMUSG00000061510	Penk	0.956567	5.38796e-05
ENSMUSG00000061510	Pex13	-0.960567	3.85728e-05
ENSMUSG00000061510	Pi15	0.955752	5.74576e-05
ENSMUSG00000061510	Pisd-ps1	0.953198	6.97462e-05
ENSMUSG00000061510	Pitrm1	-0.954802	6.18339e-05
ENSMUSG00000061510	Pla1a	0.971547	1.24423e-05
ENSMUSG00000061510	Pla2g4a	0.963851	2.85427e-05
ENSMUSG00000061510	Pla2g6	-0.957525	4.9881e-05
ENSMUSG00000061510	Plac9	0.972261	1.1391e-05
ENSMUSG00000061510	Plekhf1	0.969789	1.53219e-05
ENSMUSG00000061510	Plekho1	0.95659	5.37809e-05
ENSMUSG00000061510	Plxnb2	0.957211	5.11678e-05
ENSMUSG00000061510	Pnp2	-0.96309	3.06789e-05
ENSMUSG00000061510	Ppp1r10	-0.960963	3.72467e-05
ENSMUSG00000061510	Prcp	0.951895	7.66833e-05
ENSMUSG00000061510	Prdm5	0.963219	3.03101e-05
ENSMUSG00000061510	Prkd1	-0.986807	8.57253e-07
ENSMUSG00000061510	Prokr1	0.986336	9.68997e-07
ENSMUSG00000061510	Prss23	0.966021	2.30314e-05
ENSMUSG00000061510	Ptgis	0.978237	4.90152e-06
ENSMUSG00000061510	Ptprq	0.960978	3.71991e-05
ENSMUSG00000061510	Rab11fip5	0.952149	7.52943e-05
ENSMUSG00000061510	Rab3gap2	-0.984862	1.3846e-06
ENSMUSG00000061510	Rab9	-0.960106	4.01566e-05
ENSMUSG00000061510	Ranbp2	-0.950773	8.30402e-05
ENSMUSG00000061510	Rasd1	-0.965369	2.46018e-05
ENSMUSG00000061510	Rbm12b	0.956936	5.23125e-05
ENSMUSG00000061510	Rbp1	0.961427	3.57376e-05
ENSMUSG00000061510	Reck	0.950085	8.71119e-05
ENSMUSG00000061510	Rnase4	0.955151	6.01979e-05
ENSMUSG00000061510	Rrs1	-0.966193	2.26312e-05
ENSMUSG00000061510	Rtn1	0.961299	3.61511e-05
ENSMUSG00000061510	S100pbp	0.966333	2.23067e-05
ENSMUSG00000061510	Scamp2	0.960696	3.81388e-05
ENSMUSG00000061510	Scara3	0.966271	2.24493e-05
ENSMUSG00000061510	Scn3b	0.963033	3.08454e-05
ENSMUSG00000061510	Sema3a	0.957619	4.94998e-05
ENSMUSG00000061510	Sema3b	0.950907	8.22608e-05
ENSMUSG00000061510	Sephs2	-0.965732	2.37181e-05
ENSMUSG00000061510	Sfrp4	0.957491	5.00201e-05
ENSMUSG00000061510	Sgcd	-0.950646	8.37821e-05
ENSMUSG00000061510	Slamf9	0.956667	5.34515e-05
ENSMUSG00000061510	Slc16a2	0.950216	8.63265e-05
ENSMUSG00000061510	Slc43a3	0.984582	1.47608e-06
ENSMUSG00000061510	Slc9a9	0.953025	7.0644e-05
ENSMUSG00000061510	Slco2a1	0.961499	3.55075e-05
ENSMUSG00000061510	Slit2	0.956414	5.454e-05
ENSMUSG00000061510	Snx29	0.954912	6.13141e-05
ENSMUSG00000061510	Spg21	-0.950009	8.75718e-05
ENSMUSG00000061510	Spg7	-0.975774	7.11655e-06
ENSMUSG00000061510	Sstr4	0.957991	4.80151e-05
ENSMUSG00000061510	Stard8	0.955499	5.8597e-05
ENSMUSG00000061510	Stard9	0.960132	4.00646e-05
ENSMUSG00000061510	Suclg1	-0.950003	8.76094e-05
ENSMUSG00000061510	Sulf1	0.979847	3.75127e-06
ENSMUSG00000061510	Sult1e1	0.962553	3.22538e-05
ENSMUSG00000061510	Susd2	0.970607	1.39293e-05
ENSMUSG00000061510	Syngr2	0.957706	4.91508e-05
ENSMUSG00000061510	Taf4b	-0.967186	2.04084e-05
ENSMUSG00000061510	Tank	-0.950723	8.33292e-05
ENSMUSG00000061510	Tatdn2	-0.975785	7.1046e-06
ENSMUSG00000061510	Tbc1d14	0.952715	7.22661e-05
ENSMUSG00000061510	Tbxas1	0.95901	4.41038e-05
ENSMUSG00000061510	Timp3	0.961485	3.5553e-05
ENSMUSG00000061510	Tmc4	0.954065	6.53875e-05
ENSMUSG00000061510	Tmem229b	0.967939	1.88288e-05
ENSMUSG00000061510	Tmem38b	-0.95511	6.03896e-05
ENSMUSG00000061510	Tmem67	0.955753	5.74504e-05
ENSMUSG00000061510	Tnfrsf23	-0.95502	6.08093e-05
ENSMUSG00000061510	Tnfsf10	0.959497	4.23169e-05
ENSMUSG00000061510	Tob1	-0.975533	7.36533e-06
ENSMUSG00000061510	Top1	-0.96674	2.13859e-05
ENSMUSG00000061510	Tpsb2	0.951105	8.11217e-05
ENSMUSG00000061510	Tram1	0.950874	8.24498e-05
ENSMUSG00000061510	Upk1b	0.970111	1.4761e-05
ENSMUSG00000061510	Usp16	-0.954763	6.20164e-05
ENSMUSG00000061510	Vit	0.978815	4.46364e-06
ENSMUSG00000061510	Wdr91	0.950832	8.26928e-05
ENSMUSG00000061510	Xpnpep2	0.977038	5.90669e-06
ENSMUSG00000061510	Zbtb11	-0.968729	1.72687e-05
ENSMUSG00000061510	Zfand3	-0.958064	4.77254e-05
ENSMUSG00000061510	Zfp131	-0.980531	3.32625e-06
ENSMUSG00000061510	Zfp57	0.979018	4.31641e-06
ENSMUSG00000061510	Zranb1	-0.960141	4.00336e-05
ENSMUSG00000066057	1110032A03Rik	0.96592	2.32701e-05
ENSMUSG00000066057	1110057K04Rik	0.951279	8.013e-05
ENSMUSG00000066057	1500011K16Rik	0.957467	5.01183e-05
ENSMUSG00000066057	1700026J04Rik	0.961827	3.44712e-05
ENSMUSG00000066057	2210408I21Rik	0.957204	5.11948e-05
ENSMUSG00000066057	2410002O22Rik	0.992857	1.00739e-07
ENSMUSG00000066057	2410091C18Rik	0.96568	2.38444e-05
ENSMUSG00000066057	4430402I18Rik	0.981347	2.86597e-06
ENSMUSG00000066057	4933426M11Rik	-0.983905	1.71447e-06
ENSMUSG00000066057	5033411D12Rik	0.984698	1.43785e-06
ENSMUSG00000066057	5730455P16Rik	0.971391	1.26817e-05
ENSMUSG00000066057	Aard	0.98268	2.21355e-06
ENSMUSG00000066057	Aasdhppt	0.956698	5.33217e-05
ENSMUSG00000066057	Abcb4	0.963443	2.96761e-05
ENSMUSG00000066057	Acad9	0.976157	6.73267e-06
ENSMUSG00000066057	Acat2	0.954177	6.48386e-05
ENSMUSG00000066057	Acsl3	0.954673	6.24458e-05
ENSMUSG00000066057	Actr10	0.956196	5.54871e-05
ENSMUSG00000066057	Adal	0.96486	2.5878e-05
ENSMUSG00000066057	Adap2	-0.958251	4.6995e-05
ENSMUSG00000066057	Adsl	0.962298	3.30211e-05
ENSMUSG00000066057	Agtpbp1	0.970411	1.42541e-05
ENSMUSG00000066057	Ahr	-0.952181	7.5122e-05
ENSMUSG00000066057	AI452195	0.959574	4.20407e-05
ENSMUSG00000066057	Akap13	-0.955944	5.65975e-05
ENSMUSG00000066057	Akr1c13	0.955133	6.02816e-05
ENSMUSG00000066057	Akr1e1	0.967886	1.89375e-05
ENSMUSG00000066057	Alb	0.97257	1.09571e-05
ENSMUSG00000066057	Alcam	0.965966	2.31628e-05
ENSMUSG00000066057	Alg3	0.962574	3.21915e-05
ENSMUSG00000066057	Alkbh3	0.95968	4.16598e-05
ENSMUSG00000066057	Angel1	0.965651	2.39137e-05
ENSMUSG00000066057	Ankrd32	0.975011	7.92641e-06
ENSMUSG00000066057	Arhgap10	-0.97599	6.89829e-06
ENSMUSG00000066057	Arhgap24	0.984034	1.667e-06
ENSMUSG00000066057	Arhgef37	0.968421	1.78657e-05
ENSMUSG00000066057	Arl6	0.962056	3.37609e-05
ENSMUSG00000066057	Atp10a	0.974335	8.69613e-06
ENSMUSG00000066057	Atpbd4	0.953476	6.83262e-05
ENSMUSG00000066057	AW209491	0.968005	1.86959e-05
ENSMUSG00000066057	B230120H23Rik	0.977716	5.32201e-06
ENSMUSG00000066057	B4galt1	-0.971556	1.24284e-05
ENSMUSG00000066057	B4galt5	-0.951558	7.85581e-05
ENSMUSG00000066057	Bbs5	0.975725	7.16681e-06
ENSMUSG00000066057	BC003331	0.992197	1.37145e-07
ENSMUSG00000066057	BC006779	-0.952486	7.34811e-05
ENSMUSG00000066057	Bcas3	0.952729	7.21945e-05
ENSMUSG00000066057	Bcl6b	-0.966786	2.1283e-05
ENSMUSG00000066057	Bptf	-0.965436	2.44364e-05
ENSMUSG00000066057	Btnl9	-0.976832	6.09263e-06
ENSMUSG00000066057	C530030P08Rik	-0.970891	1.34673e-05
ENSMUSG00000066057	C5ar1	-0.960231	3.97209e-05
ENSMUSG00000066057	Cab39l	0.95159	7.83795e-05
ENSMUSG00000066057	Car13	0.956107	5.58793e-05
ENSMUSG00000066057	Ccdc104	0.951825	7.70744e-05
ENSMUSG00000066057	Ccnh	0.968626	1.7466e-05
ENSMUSG00000066057	Cd86	-0.971349	1.27453e-05
ENSMUSG00000066057	Cd93	-0.964797	2.60382e-05
ENSMUSG00000066057	Cd97	-0.978926	4.38278e-06
ENSMUSG00000066057	Cdc123	0.958175	4.7289e-05
ENSMUSG00000066057	Cdh5	-0.956072	5.60339e-05
ENSMUSG00000066057	Chrna5	0.964079	2.79242e-05
ENSMUSG00000066057	Cinp	0.953812	6.66365e-05
ENSMUSG00000066057	Commd3	0.968641	1.74375e-05
ENSMUSG00000066057	Copb1	0.954208	6.46849e-05
ENSMUSG00000066057	Copg2	0.950992	8.17728e-05
ENSMUSG00000066057	Cops3	0.98151	2.77959e-06
ENSMUSG00000066057	Cops6	0.956694	5.33362e-05
ENSMUSG00000066057	Copz1	0.961075	3.68802e-05
ENSMUSG00000066057	Crot	0.991859	1.59054e-07
ENSMUSG00000066057	Crym	-0.951399	7.94512e-05
ENSMUSG00000066057	Cryz	0.993128	8.79777e-08
ENSMUSG00000066057	Ctps2	0.983391	1.91313e-06
ENSMUSG00000066057	Cul5	0.988492	5.32288e-07
ENSMUSG00000066057	Cyb5b	0.967995	1.87152e-05
ENSMUSG00000066057	Cyp51	0.963339	2.99702e-05
ENSMUSG00000066057	Dars	0.950089	8.70894e-05
ENSMUSG00000066057	Dclre1a	0.973243	1.00513e-05
ENSMUSG00000066057	Ddt	0.971238	1.29183e-05
ENSMUSG00000066057	Ddx17	-0.950577	8.41827e-05
ENSMUSG00000066057	Ddx3y	0.971784	1.20857e-05
ENSMUSG00000066057	Ddx56	0.979391	4.05483e-06
ENSMUSG00000066057	Decr2	0.957336	5.06541e-05
ENSMUSG00000066057	Dennd3	-0.974579	8.41202e-06
ENSMUSG00000066057	Dgkh	-0.95583	5.71073e-05
ENSMUSG00000066057	Dhcr7	0.951402	7.94308e-05
ENSMUSG00000066057	Dhx29	0.959591	4.19794e-05
ENSMUSG00000066057	Dido1	-0.966062	2.29354e-05
ENSMUSG00000066057	Dis3l	0.958066	4.77161e-05
ENSMUSG00000066057	Dnajc21	0.951337	7.97976e-05
ENSMUSG00000066057	Dock9	-0.9738	9.34222e-06
ENSMUSG00000066057	Dusp19	0.971266	1.28747e-05
ENSMUSG00000066057	Dysf	-0.962357	3.28425e-05
ENSMUSG00000066057	E2f6	0.95739	5.0431e-05
ENSMUSG00000066057	Echdc1	0.97097	1.33401e-05
ENSMUSG00000066057	Ednrb	-0.959567	4.2066e-05
ENSMUSG00000066057	Eid2b	0.965718	2.37521e-05
ENSMUSG00000066057	Eif2s1	0.962804	3.1511e-05
ENSMUSG00000066057	Elovl6	0.980094	3.59368e-06
ENSMUSG00000066057	Eltd1	-0.956062	5.60754e-05
ENSMUSG00000066057	Emp2	-0.968827	1.7081e-05
ENSMUSG00000066057	Epb4.1l2	0.961869	3.43396e-05
ENSMUSG00000066057	Ern1	-0.961206	3.64501e-05
ENSMUSG00000066057	Esf1	0.950383	8.53285e-05
ENSMUSG00000066057	Etfdh	0.974862	8.09147e-06
ENSMUSG00000066057	Etl4	-0.974009	9.08615e-06
ENSMUSG00000066057	Extl2	0.992142	1.40518e-07
ENSMUSG00000066057	Fabp5	0.957509	4.99476e-05
ENSMUSG00000066057	Fam158a	0.969347	1.61125e-05
ENSMUSG00000066057	Fam175a	0.9826	2.24956e-06
ENSMUSG00000066057	Fam36a	-0.968052	1.86004e-05
ENSMUSG00000066057	Fam43a	-0.984805	1.40289e-06
ENSMUSG00000066057	Fam45a	0.97167	1.22561e-05
ENSMUSG00000066057	Fam65a	-0.953864	6.63807e-05
ENSMUSG00000066057	Fam82a1	0.960727	3.80348e-05
ENSMUSG00000066057	Fam96a	0.951808	7.7164e-05
ENSMUSG00000066057	Fancl	0.977698	5.33677e-06
ENSMUSG00000066057	Fastkd2	0.985076	1.31755e-06
ENSMUSG00000066057	Fbxo36	0.963262	3.01882e-05
ENSMUSG00000066057	Fdps	0.973079	1.02671e-05
ENSMUSG00000066057	Fgd5	-0.950579	8.4171e-05
ENSMUSG00000066057	Fkbp14	0.979327	4.09902e-06
ENSMUSG00000066057	Fktn	0.984729	1.42746e-06
ENSMUSG00000066057	Flot1	0.977459	5.53886e-06
ENSMUSG00000066057	Flt1	-0.981436	2.81853e-06
ENSMUSG00000066057	Fmr1	0.964044	2.80192e-05
ENSMUSG00000066057	Folh1	0.955975	5.64622e-05
ENSMUSG00000066057	Frmpd1	0.969046	1.66687e-05
ENSMUSG00000066057	G630090E17Rik	0.964041	2.80265e-05
ENSMUSG00000066057	G6pd2	0.967872	1.89661e-05
ENSMUSG00000066057	G6pdx	0.956903	5.24505e-05
ENSMUSG00000066057	Gbas	0.979036	4.30342e-06
ENSMUSG00000066057	Gfm1	0.983432	1.89641e-06
ENSMUSG00000066057	Gfpt2	-0.978558	4.65421e-06
ENSMUSG00000066057	Ghdc	0.982512	2.28947e-06
ENSMUSG00000066057	Glod4	0.95928	4.3105e-05
ENSMUSG00000066057	Glrx	0.960855	3.76068e-05
ENSMUSG00000066057	Gm11818	0.962145	3.34858e-05
ENSMUSG00000066057	Gm6623	0.960614	3.84122e-05
ENSMUSG00000066057	Gpatch1	0.954926	6.12471e-05
ENSMUSG00000066057	Gpn1	0.961488	3.55432e-05
ENSMUSG00000066057	Gpr4	-0.963519	2.94617e-05
ENSMUSG00000066057	Gstk1	0.952497	7.34248e-05
ENSMUSG00000066057	Gtf3c6	0.964006	2.81214e-05
ENSMUSG00000066057	Gyk	0.982151	2.45841e-06
ENSMUSG00000066057	Hapln3	0.958085	4.76425e-05
ENSMUSG00000066057	Hars2	0.952402	7.39304e-05
ENSMUSG00000066057	Hbp1	0.967643	1.94403e-05
ENSMUSG00000066057	Hecw2	-0.951243	8.03321e-05
ENSMUSG00000066057	Heg1	-0.982791	2.16451e-06
ENSMUSG00000066057	Hexim1	0.952918	7.11981e-05
ENSMUSG00000066057	Hgf	0.965406	2.45101e-05
ENSMUSG00000066057	Hn1l	0.957227	5.11013e-05
ENSMUSG00000066057	Hoxa9	0.957658	4.93438e-05
ENSMUSG00000066057	Hoxc10	0.975139	7.78554e-06
ENSMUSG00000066057	Hoxc5	0.969934	1.50667e-05
ENSMUSG00000066057	Hps5	0.963741	2.88463e-05
ENSMUSG00000066057	Hsd17b7	0.9632	3.03639e-05
ENSMUSG00000066057	Idh3a	0.969896	1.51343e-05
ENSMUSG00000066057	Idh3b	0.967614	1.94995e-05
ENSMUSG00000066057	Idi1	0.961606	3.51658e-05
ENSMUSG00000066057	Il3ra	-0.970316	1.44137e-05
ENSMUSG00000066057	Il6st	-0.952281	7.45823e-05
ENSMUSG00000066057	Ism1	-0.965132	2.51893e-05
ENSMUSG00000066057	Itga5	-0.963654	2.90857e-05
ENSMUSG00000066057	Kcnq4	0.959081	4.38407e-05
ENSMUSG00000066057	l7Rn6	0.961933	3.41409e-05
ENSMUSG00000066057	Lactb2	0.961189	3.65057e-05
ENSMUSG00000066057	Large	0.988059	6.05605e-07
ENSMUSG00000066057	Ldha	0.990896	2.34985e-07
ENSMUSG00000066057	Leng8	-0.986389	9.55802e-07
ENSMUSG00000066057	Lig4	0.959319	4.29656e-05
ENSMUSG00000066057	Lima1	-0.972948	1.0442e-05
ENSMUSG00000066057	Lpcat3	0.971415	1.26435e-05
ENSMUSG00000066057	Lpl	0.970624	1.39007e-05
ENSMUSG00000066057	Lrp1	-0.968025	1.86552e-05
ENSMUSG00000066057	Lrrc39	0.977421	5.5711e-06
ENSMUSG00000066057	Lrrc59	0.95536	5.9235e-05
ENSMUSG00000066057	Lrrc8a	-0.963855	2.85321e-05
ENSMUSG00000066057	Lss	0.982173	2.44759e-06
ENSMUSG00000066057	Ltn1	0.953261	6.94271e-05
ENSMUSG00000066057	Mal2	0.955528	5.84675e-05
ENSMUSG00000066057	Man2a1	-0.973283	9.99862e-06
ENSMUSG00000066057	Matn2	0.954507	6.32394e-05
ENSMUSG00000066057	Mblac2	0.95513	6.0297e-05
ENSMUSG00000066057	Mcf2l	-0.959169	4.35149e-05
ENSMUSG00000066057	Med12	-0.972165	1.15286e-05
ENSMUSG00000066057	Med21	0.971154	1.30502e-05
ENSMUSG00000066057	Mettl4	0.972083	1.1648e-05
ENSMUSG00000066057	Mfsd8	0.968209	1.82855e-05
ENSMUSG00000066057	Mina	0.950371	8.5401e-05
ENSMUSG00000066057	Mlkl	0.986325	9.71503e-07
ENSMUSG00000066057	Mlxip	-0.988273	5.68502e-07
ENSMUSG00000066057	Mr1	0.965267	2.48537e-05
ENSMUSG00000066057	Mrpl16	0.97857	4.64541e-06
ENSMUSG00000066057	Mrps22	0.975084	7.84565e-06
ENSMUSG00000066057	Mrps6	0.960629	3.83644e-05
ENSMUSG00000066057	Mtif2	0.970294	1.44502e-05
ENSMUSG00000066057	Mtpap	0.974023	9.06885e-06
ENSMUSG00000066057	Mup1	0.979252	4.15116e-06
ENSMUSG00000066057	Mup2	0.974801	8.16022e-06
ENSMUSG00000066057	Mustn1	-0.95166	7.79881e-05
ENSMUSG00000066057	Muted	0.978601	4.62193e-06
ENSMUSG00000066057	Mvk	0.975841	7.04772e-06
ENSMUSG00000066057	Myl4	0.981227	2.93036e-06
ENSMUSG00000066057	N6amt2	0.958386	4.64713e-05
ENSMUSG00000066057	Nav1	-0.956069	5.6046e-05
ENSMUSG00000066057	Ncoa4	0.965581	2.40826e-05
ENSMUSG00000066057	Ndrg1	-0.966788	2.12798e-05
ENSMUSG00000066057	Ndufaf2	0.964538	2.67089e-05
ENSMUSG00000066057	Ndufs1	0.968642	1.74367e-05
ENSMUSG00000066057	Nid2	0.960933	3.73474e-05
ENSMUSG00000066057	Nipsnap3b	0.96384	2.85736e-05
ENSMUSG00000066057	Nln	0.950853	8.25743e-05
ENSMUSG00000066057	Noc3l	0.978867	4.42509e-06
ENSMUSG00000066057	Notch2	-0.954251	6.4476e-05
ENSMUSG00000066057	Npc1	-0.96497	2.55972e-05
ENSMUSG00000066057	Nsun6	0.960138	4.00444e-05
ENSMUSG00000066057	Nt5dc1	0.96268	3.18773e-05
ENSMUSG00000066057	Ntm	0.956012	5.62957e-05
ENSMUSG00000066057	Nudcd1	0.957058	5.18019e-05
ENSMUSG00000066057	Nudt2	0.974156	8.9095e-06
ENSMUSG00000066057	Olfml1	0.955776	5.73487e-05
ENSMUSG00000066057	Osgepl1	0.977489	5.51259e-06
ENSMUSG00000066057	Oxsm	0.972865	1.05531e-05
ENSMUSG00000066057	Pacs2	-0.959389	4.27099e-05
ENSMUSG00000066057	Pafah2	0.95905	4.39556e-05
ENSMUSG00000066057	Pam16	0.956321	5.49418e-05
ENSMUSG00000066057	Parp3	0.985403	1.21966e-06
ENSMUSG00000066057	Parp9	0.976496	6.40531e-06
ENSMUSG00000066057	Parvb	-0.96325	3.02212e-05
ENSMUSG00000066057	Pcyt2	0.958211	4.71501e-05
ENSMUSG00000066057	Pdha1	0.961095	3.68156e-05
ENSMUSG00000066057	Pdia4	-0.960886	3.75035e-05
ENSMUSG00000066057	Pdzd11	0.953681	6.72959e-05
ENSMUSG00000066057	Pex3	0.97435	8.67936e-06
ENSMUSG00000066057	Pgd	0.963932	2.8324e-05
ENSMUSG00000066057	Pgp	0.975957	6.93105e-06
ENSMUSG00000066057	Phb	0.955603	5.8129e-05
ENSMUSG00000066057	Phf12	-0.977852	5.20996e-06
ENSMUSG00000066057	Phkb	0.981126	2.9857e-06
ENSMUSG00000066057	Pkd1	-0.971443	1.26012e-05
ENSMUSG00000066057	Plaa	0.95945	4.24889e-05
ENSMUSG00000066057	Plek	-0.951055	8.1409e-05
ENSMUSG00000066057	Plekho2	-0.974468	8.54033e-06
ENSMUSG00000066057	Pm20d1	0.978675	4.56675e-06
ENSMUSG00000066057	Pmpca	0.982492	2.29869e-06
ENSMUSG00000066057	Pot1a	0.953526	6.80761e-05
ENSMUSG00000066057	Ppp1r12c	-0.957003	5.20329e-05
ENSMUSG00000066057	Ppp2r2a	0.957198	5.12227e-05
ENSMUSG00000066057	Ppp2r2d	0.964581	2.65961e-05
ENSMUSG00000066057	Ppp2r3c	0.973509	9.70769e-06
ENSMUSG00000066057	Ppp2r5a	0.951588	7.83876e-05
ENSMUSG00000066057	Ppp2r5b	0.950232	8.62288e-05
ENSMUSG00000066057	Prkx	-0.968865	1.70094e-05
ENSMUSG00000066057	Procr	-0.966953	2.09156e-05
ENSMUSG00000066057	Prpsap2	0.955503	5.85811e-05
ENSMUSG00000066057	Psma2	0.96989	1.51435e-05
ENSMUSG00000066057	Psmd5	0.961275	3.62291e-05
ENSMUSG00000066057	Psmd6	0.964048	2.80093e-05
ENSMUSG00000066057	Ptbp1	0.951176	8.07155e-05
ENSMUSG00000066057	Ptcd3	0.965904	2.33081e-05
ENSMUSG00000066057	Pten	0.978065	5.03737e-06
ENSMUSG00000066057	Pter	0.957108	5.15952e-05
ENSMUSG00000066057	Ptgfr	0.96456	2.66515e-05
ENSMUSG00000066057	Ptpru	-0.967673	1.93778e-05
ENSMUSG00000066057	Pts	0.965415	2.44885e-05
ENSMUSG00000066057	Rab43	-0.963026	3.08634e-05
ENSMUSG00000066057	Rabggtb	0.958257	4.69692e-05
ENSMUSG00000066057	Rapgef1	-0.980823	3.15621e-06
ENSMUSG00000066057	Rasip1	-0.974889	8.06155e-06
ENSMUSG00000066057	Rb1	0.95278	7.19228e-05
ENSMUSG00000066057	Recql	0.962627	3.20331e-05
ENSMUSG00000066057	Rell1	-0.962006	3.39147e-05
ENSMUSG00000066057	Rfc4	0.984903	1.3717e-06
ENSMUSG00000066057	Rhoj	-0.958255	4.69782e-05
ENSMUSG00000066057	Rmi1	0.969554	1.57381e-05
ENSMUSG00000066057	Rnls	0.965262	2.48658e-05
ENSMUSG00000066057	Rpe	0.967452	1.98398e-05
ENSMUSG00000066057	Rpp40	0.965955	2.31888e-05
ENSMUSG00000066057	Rrn3	0.958978	4.42232e-05
ENSMUSG00000066057	Sacm1l	0.959235	4.32705e-05
ENSMUSG00000066057	Sar1b	0.960821	3.77177e-05
ENSMUSG00000066057	Sc5d	0.98967	3.65238e-07
ENSMUSG00000066057	Scfd1	0.97496	7.98222e-06
ENSMUSG00000066057	Scrn3	0.970477	1.41444e-05
ENSMUSG00000066057	Sdhaf2	0.95224	7.48054e-05
ENSMUSG00000066057	Sec23b	0.960271	3.95839e-05
ENSMUSG00000066057	Secisbp2l	0.969127	1.65174e-05
ENSMUSG00000066057	2016-09-15	0.970823	1.35774e-05
ENSMUSG00000066057	Sfswap	-0.962589	3.21472e-05
ENSMUSG00000066057	Sgcb	0.971741	1.21499e-05
ENSMUSG00000066057	Sgce	0.978289	4.86067e-06
ENSMUSG00000066057	Sh2b3	-0.983524	1.86001e-06
ENSMUSG00000066057	Shank3	-0.978448	4.73816e-06
ENSMUSG00000066057	Sit1	-0.965607	2.40194e-05
ENSMUSG00000066057	Skiv2l2	0.980937	3.09141e-06
ENSMUSG00000066057	Slc12a9	-0.959829	4.11298e-05
ENSMUSG00000066057	Slc16a6	-0.959994	4.05476e-05
ENSMUSG00000066057	Slc22a4	0.978835	4.44837e-06
ENSMUSG00000066057	Slc25a10	0.973658	9.51989e-06
ENSMUSG00000066057	Slc25a17	0.974196	8.86097e-06
ENSMUSG00000066057	Slc36a2	0.952287	7.4548e-05
ENSMUSG00000066057	Slco2b1	-0.978498	4.69999e-06
ENSMUSG00000066057	Slfn2	-0.960125	4.00902e-05
ENSMUSG00000066057	Smg1	-0.961464	3.56188e-05
ENSMUSG00000066057	Snupn	0.953506	6.81782e-05
ENSMUSG00000066057	Solh	-0.966527	2.1864e-05
ENSMUSG00000066057	Spaca1	0.967492	1.97555e-05
ENSMUSG00000066057	Spata13	-0.951497	7.88983e-05
ENSMUSG00000066057	Sptlc1	0.959695	4.16073e-05
ENSMUSG00000066057	Sqle	0.953241	6.95253e-05
ENSMUSG00000066057	Srp72	0.989327	4.09272e-07
ENSMUSG00000066057	Srpx2	0.962334	3.2913e-05
ENSMUSG00000066057	Srr	0.960137	4.00494e-05
ENSMUSG00000066057	Srrm2	-0.962358	3.28378e-05
ENSMUSG00000066057	St3gal1	-0.983275	1.95997e-06
ENSMUSG00000066057	Stambp	0.978895	4.40521e-06
ENSMUSG00000066057	Synj2bp	0.972958	1.04275e-05
ENSMUSG00000066057	Taco1	0.97721	5.75402e-06
ENSMUSG00000066057	Tatdn1	0.956347	5.48274e-05
ENSMUSG00000066057	Tax1bp1	0.963397	2.98038e-05
ENSMUSG00000066057	Tbc1d19	0.981862	2.59971e-06
ENSMUSG00000066057	Tecr	0.952169	7.51875e-05
ENSMUSG00000066057	Tfg	0.955437	5.88828e-05
ENSMUSG00000066057	Tlcd1	0.951315	7.99229e-05
ENSMUSG00000066057	Tlcd2	0.977215	5.74993e-06
ENSMUSG00000066057	Tm4sf1	-0.958898	4.45224e-05
ENSMUSG00000066057	Tmem135	0.954626	6.26693e-05
ENSMUSG00000066057	Tmem184c	0.979822	3.76731e-06
ENSMUSG00000066057	Tmem19	0.951116	8.10589e-05
ENSMUSG00000066057	Tmf1	0.966733	2.14027e-05
ENSMUSG00000066057	Tnrc6c	-0.974215	8.83875e-06
ENSMUSG00000066057	Tsen2	0.963441	2.96809e-05
ENSMUSG00000066057	Tshz2	-0.979624	3.89799e-06
ENSMUSG00000066057	Tspan7	-0.970619	1.3909e-05
ENSMUSG00000066057	Ttc37	0.965436	2.44364e-05
ENSMUSG00000066057	Tubb6	-0.951809	7.71614e-05
ENSMUSG00000066057	Txnl4b	0.951276	8.01471e-05
ENSMUSG00000066057	Uba3	0.954385	6.38251e-05
ENSMUSG00000066057	Ube2w	0.986153	1.01491e-06
ENSMUSG00000066057	Uevld	0.973119	1.02143e-05
ENSMUSG00000066057	Ufm1	0.974336	8.69505e-06
ENSMUSG00000066057	Ugp2	0.964762	2.61272e-05
ENSMUSG00000066057	Umps	0.957348	5.06046e-05
ENSMUSG00000066057	Upf2	0.976429	6.46934e-06
ENSMUSG00000066057	Uso1	0.988028	6.1107e-07
ENSMUSG00000066057	Usp14	0.972373	1.12333e-05
ENSMUSG00000066057	Usp39	0.956844	5.26994e-05
ENSMUSG00000066057	Usp5	0.951594	7.83531e-05
ENSMUSG00000066057	Vps35	0.979619	3.90099e-06
ENSMUSG00000066057	Vps45	0.965844	2.34504e-05
ENSMUSG00000066057	Vti1b	0.973818	9.31994e-06
ENSMUSG00000066057	Wdfy3	-0.967905	1.88987e-05
ENSMUSG00000066057	Wdr1	-0.962201	3.33169e-05
ENSMUSG00000066057	Wdr75	0.955554	5.83482e-05
ENSMUSG00000066057	Yipf1	0.953576	6.78195e-05
ENSMUSG00000066057	Ypel3	-0.967841	1.9029e-05
ENSMUSG00000066057	Zcrb1	0.960593	3.84845e-05
ENSMUSG00000066057	Zdhhc2	0.961249	3.6311e-05
ENSMUSG00000066057	Zeb2	0.980281	3.47763e-06
ENSMUSG00000066057	Zfand2a	0.95415	6.49696e-05
ENSMUSG00000066057	Zfp513	-0.950053	8.73081e-05
ENSMUSG00000066057	Zfp652	-0.959045	4.39725e-05
ENSMUSG00000066057	Zfp654	0.953232	6.95738e-05
ENSMUSG00000066057	Zmiz1	-0.987859	6.41721e-07
ENSMUSG00000066057	Zyx	-0.971097	1.314e-05
ENSMUSG00000072679	A630089N07Rik	-0.961437	3.57043e-05
ENSMUSG00000072679	Alg12	-0.971194	1.29868e-05
ENSMUSG00000072679	Api5	-0.968566	1.75837e-05
ENSMUSG00000072679	Arfgap3	-0.977997	5.0923e-06
ENSMUSG00000072679	Atg4b	-0.978278	4.86936e-06
ENSMUSG00000072679	Clcf1	0.95093	8.21253e-05
ENSMUSG00000072679	Cnot8	-0.953846	6.64673e-05
ENSMUSG00000072679	D16H22S680E	-0.97146	1.2575e-05
ENSMUSG00000072679	Dctn5	-0.97687	6.05779e-06
ENSMUSG00000072679	Dph2	-0.980402	3.40367e-06
ENSMUSG00000072679	E030010A14Rik	0.955496	5.86134e-05
ENSMUSG00000072679	Epm2aip1	-0.953469	6.83621e-05
ENSMUSG00000072679	Gm13926	0.973331	9.93615e-06
ENSMUSG00000072679	Golph3l	-0.959889	4.09179e-05
ENSMUSG00000072679	Gtf3c4	-0.964927	2.57068e-05
ENSMUSG00000072679	Hivep3	0.95075	8.31735e-05
ENSMUSG00000072679	Ints9	-0.951278	8.01339e-05
ENSMUSG00000072679	Lman1	-0.963911	2.83794e-05
ENSMUSG00000072679	Mgat2	-0.953515	6.81309e-05
ENSMUSG00000072679	Mis12	-0.952965	7.09524e-05
ENSMUSG00000072679	Morn3	0.951999	7.61159e-05
ENSMUSG00000072679	Polr3c	-0.957903	4.83627e-05
ENSMUSG00000072679	Pqlc1	0.95355	6.79547e-05
ENSMUSG00000072679	Pqlc3	-0.967561	1.96106e-05
ENSMUSG00000072679	Prps2	-0.969935	1.50656e-05
ENSMUSG00000072679	Psme1	-0.976129	6.7605e-06
ENSMUSG00000072679	Sarnp	-0.953537	6.80201e-05
ENSMUSG00000072679	Sash1	0.967837	1.90379e-05
ENSMUSG00000072679	Sftpc	0.951824	7.70781e-05
ENSMUSG00000072679	Stam2	-0.956964	5.21943e-05
ENSMUSG00000072679	Tacc2	0.959965	4.06507e-05
ENSMUSG00000072679	Tbc1d24	-0.951627	7.81681e-05
ENSMUSG00000072679	Trmt2b	-0.964837	2.59349e-05
ENSMUSG00000072679	Ttc9c	-0.950731	8.3281e-05
ENSMUSG00000072679	Uba6	-0.962699	3.18216e-05
ENSMUSG00000072679	Vkorc1	-0.96083	3.76895e-05
ENSMUSG00000072679	Vmn1r177	0.958883	4.45773e-05
ENSMUSG00000072679	Wdr48	-0.979311	4.10984e-06
ENSMUSG00000072679	Zfp260	-0.974665	8.31419e-06
ENSMUSG00000072686	Col4a1	0.958644	4.54791e-05
ENSMUSG00000072686	Cpt1b	-0.966706	2.14613e-05
ENSMUSG00000072686	Dennd5b	0.965905	2.33058e-05
ENSMUSG00000072686	Furin	0.968498	1.77146e-05
ENSMUSG00000072686	Gm10419	0.950864	8.25082e-05
ENSMUSG00000072686	Lrp5	0.951135	8.09489e-05
ENSMUSG00000072686	Myd88	0.954706	6.22869e-05
ENSMUSG00000072686	P4ha2	-0.951299	8.00137e-05
ENSMUSG00000072686	Pi4ka	0.972068	1.16685e-05
ENSMUSG00000072686	Podnl1	-0.955371	5.91831e-05
ENSMUSG00000072686	Ppm1m	0.965236	2.49299e-05
ENSMUSG00000072686	Rnf44	0.958401	4.64112e-05
ENSMUSG00000072686	Rnpepl1	0.957903	4.83632e-05
ENSMUSG00000072686	Tnfrsf1a	0.96295	3.10836e-05
ENSMUSG00000072686	Trex1	0.980747	3.19982e-06
ENSMUSG00000072686	Zfp60	-0.950932	8.21159e-05
ENSMUSG00000072761	4921508M14Rik	-0.955529	5.84631e-05
ENSMUSG00000072761	6330416L07Rik	0.958621	4.55691e-05
ENSMUSG00000072761	9030625A04Rik	0.979576	3.92973e-06
ENSMUSG00000072761	A630089N07Rik	0.971641	1.2301e-05
ENSMUSG00000072761	BC003267	0.953763	6.68813e-05
ENSMUSG00000072761	Capza2	0.960821	3.77191e-05
ENSMUSG00000072761	Ccdc155	-0.953518	6.81138e-05
ENSMUSG00000072761	Ccdc85b	-0.957708	4.91405e-05
ENSMUSG00000072761	Exoc6	0.96367	2.90408e-05
ENSMUSG00000072761	Fgfr1	-0.954762	6.20236e-05
ENSMUSG00000072761	Gm13154	0.963727	2.88851e-05
ENSMUSG00000072761	Gm572	-0.950846	8.26113e-05
ENSMUSG00000072761	Hdac9	0.961776	3.46301e-05
ENSMUSG00000072761	Hoxd8	0.966973	2.0871e-05
ENSMUSG00000072761	Mat2b	0.95778	4.88541e-05
ENSMUSG00000072761	Olfr179	-0.950132	8.68303e-05
ENSMUSG00000072761	Pde7a	0.961519	3.54427e-05
ENSMUSG00000072761	Plac1l	-0.952936	7.11085e-05
ENSMUSG00000072761	Pls3	0.955804	5.72216e-05
ENSMUSG00000072761	Pnrc2	0.959331	4.29196e-05
ENSMUSG00000072761	Ppp1r7	0.965748	2.36814e-05
ENSMUSG00000072761	Pqlc3	0.957272	5.09169e-05
ENSMUSG00000072761	Prps2	0.959228	4.32981e-05
ENSMUSG00000072761	Rlbp1	-0.956751	5.30931e-05
ENSMUSG00000072761	Rnasel	0.983621	1.82238e-06
ENSMUSG00000072761	Scaf1	-0.954653	6.2539e-05
ENSMUSG00000072761	Sf3a3	0.954883	6.14517e-05
ENSMUSG00000072761	Sh3bgrl2	0.982697	2.20625e-06
ENSMUSG00000072761	Sphkap	-0.956468	5.43063e-05
ENSMUSG00000072761	Spopl	0.956935	5.23157e-05
ENSMUSG00000072761	Ssbp1	0.953736	6.70162e-05
ENSMUSG00000072761	Tspan31	0.952681	7.24456e-05
ENSMUSG00000072761	Tug1	0.961472	3.55927e-05
ENSMUSG00000072761	Usp8	0.952532	7.32382e-05
ENSMUSG00000072761	Uspl1	0.976333	6.56106e-06
ENSMUSG00000072761	Zdhhc21	0.957434	5.02503e-05
ENSMUSG00000072761	Zfml	0.958604	4.56344e-05
ENSMUSG00000072761	Zfp260	0.957663	4.93237e-05
ENSMUSG00000072761	Zfp788	0.978012	5.07979e-06
ENSMUSG00000072761	Zswim1	0.976455	6.44439e-06
ENSMUSG00000073067	1110032A13Rik	-0.967384	1.99837e-05
ENSMUSG00000073067	1700009P17Rik	-0.965249	2.48979e-05
ENSMUSG00000073067	2410002O22Rik	-0.957973	4.8085e-05
ENSMUSG00000073067	2700062C07Rik	-0.955455	5.87983e-05
ENSMUSG00000073067	4430402I18Rik	-0.968472	1.77667e-05
ENSMUSG00000073067	4933426M11Rik	0.952595	7.29019e-05
ENSMUSG00000073067	5033411D12Rik	-0.963539	2.9407e-05
ENSMUSG00000073067	Acaa2	-0.960016	4.04698e-05
ENSMUSG00000073067	Acad9	-0.967207	2.03629e-05
ENSMUSG00000073067	AI452195	-0.96279	3.15525e-05
ENSMUSG00000073067	Akr1c13	-0.982185	2.44214e-06
ENSMUSG00000073067	Akr1e1	-0.972155	1.15433e-05
ENSMUSG00000073067	Alg11	-0.952913	7.12283e-05
ENSMUSG00000073067	Arl6	-0.958877	4.45995e-05
ENSMUSG00000073067	Bbs5	-0.951692	7.78084e-05
ENSMUSG00000073067	BC048403	-0.953159	6.99506e-05
ENSMUSG00000073067	Bcl2l1	0.951896	7.66779e-05
ENSMUSG00000073067	Ccdc122	-0.961924	3.417e-05
ENSMUSG00000073067	Ccdc58	-0.958131	4.74637e-05
ENSMUSG00000073067	Ccdc86	-0.962749	3.16717e-05
ENSMUSG00000073067	Cd163	0.956503	5.41536e-05
ENSMUSG00000073067	Cd59b	-0.959422	4.25893e-05
ENSMUSG00000073067	Cd97	0.951185	8.06639e-05
ENSMUSG00000073067	Cdc16	-0.96549	2.43044e-05
ENSMUSG00000073067	Copb1	-0.959721	4.15124e-05
ENSMUSG00000073067	Copg2	-0.966907	2.1017e-05
ENSMUSG00000073067	Creb5	0.974177	8.88429e-06
ENSMUSG00000073067	Crnkl1	-0.963118	3.05988e-05
ENSMUSG00000073067	Crot	-0.957839	4.86178e-05
ENSMUSG00000073067	Dclre1a	-0.963772	2.87607e-05
ENSMUSG00000073067	Ddt	-0.971362	1.27259e-05
ENSMUSG00000073067	Dhcr7	-0.961845	3.44156e-05
ENSMUSG00000073067	Ednrb	0.962452	3.25561e-05
ENSMUSG00000073067	Eif2s1	-0.954173	6.4857e-05
ENSMUSG00000073067	Eif4ebp3	0.951159	8.08119e-05
ENSMUSG00000073067	Eltd1	0.987108	7.91097e-07
ENSMUSG00000073067	Emp2	0.955517	5.85151e-05
ENSMUSG00000073067	Ercc2	-0.950283	8.59233e-05
ENSMUSG00000073067	Extl2	-0.97523	7.68761e-06
ENSMUSG00000073067	Fam175a	-0.962648	3.19715e-05
ENSMUSG00000073067	Fam36a	0.967599	1.95323e-05
ENSMUSG00000073067	Fam43a	0.960067	4.02929e-05
ENSMUSG00000073067	Fam46b	0.953638	6.75101e-05
ENSMUSG00000073067	Fam65a	0.970852	1.35296e-05
ENSMUSG00000073067	Fam92a	-0.963598	2.92426e-05
ENSMUSG00000073067	Fancl	-0.951315	7.99239e-05
ENSMUSG00000073067	Fdxacb1	-0.952852	7.15432e-05
ENSMUSG00000073067	Fgl2	0.95329	6.92743e-05
ENSMUSG00000073067	Fkbp7	-0.983049	2.05382e-06
ENSMUSG00000073067	Fktn	-0.964175	2.76666e-05
ENSMUSG00000073067	Flt1	0.967951	1.8806e-05
ENSMUSG00000073067	Frrs1	-0.975484	7.41727e-06
ENSMUSG00000073067	Gbas	-0.964897	2.57816e-05
ENSMUSG00000073067	Gbp2	-0.964261	2.74366e-05
ENSMUSG00000073067	Gfpt2	0.97395	9.15791e-06
ENSMUSG00000073067	Gm11818	-0.969154	1.64672e-05
ENSMUSG00000073067	Gnpnat1	-0.952032	7.59322e-05
ENSMUSG00000073067	Gpn1	-0.960134	4.00595e-05
ENSMUSG00000073067	Gpr116	0.961185	3.65206e-05
ENSMUSG00000073067	Gpr89	-0.970174	1.46535e-05
ENSMUSG00000073067	Has2	0.958431	4.62952e-05
ENSMUSG00000073067	Hba-a1	0.962299	3.30185e-05
ENSMUSG00000073067	Heg1	0.977841	5.21909e-06
ENSMUSG00000073067	Hes1	-0.959218	4.3335e-05
ENSMUSG00000073067	Hgf	-0.971986	1.17888e-05
ENSMUSG00000073067	Htra1	-0.966707	2.14601e-05
ENSMUSG00000073067	Il6st	0.970365	1.43312e-05
ENSMUSG00000073067	Inmt	0.953807	6.66635e-05
ENSMUSG00000073067	Itga5	0.958658	4.54269e-05
ENSMUSG00000073067	Large	-0.967437	1.98725e-05
ENSMUSG00000073067	Lars	-0.972292	1.13472e-05
ENSMUSG00000073067	Lrrc59	-0.952562	7.30778e-05
ENSMUSG00000073067	Lrrc8a	0.965231	2.49433e-05
ENSMUSG00000073067	Ltv1	-0.962652	3.19604e-05
ENSMUSG00000073067	Man2a1	0.971873	1.19546e-05
ENSMUSG00000073067	Med8	-0.967132	2.05249e-05
ENSMUSG00000073067	Mett10d	-0.968062	1.85805e-05
ENSMUSG00000073067	Mettl8	-0.974568	8.42476e-06
ENSMUSG00000073067	Mlkl	-0.951288	8.00754e-05
ENSMUSG00000073067	Mn1	0.953477	6.8324e-05
ENSMUSG00000073067	Mtfmt	-0.956436	5.44441e-05
ENSMUSG00000073067	Mup1	-0.957033	5.19052e-05
ENSMUSG00000073067	Mup2	-0.971931	1.18691e-05
ENSMUSG00000073067	Mustn1	0.98024	3.50264e-06
ENSMUSG00000073067	Mvk	-0.952441	7.37237e-05
ENSMUSG00000073067	Myadm	0.967267	2.02333e-05
ENSMUSG00000073067	Ndrg1	0.959528	4.22062e-05
ENSMUSG00000073067	Nedd4l	-0.954559	6.29899e-05
ENSMUSG00000073067	Nmd3	-0.956233	5.53248e-05
ENSMUSG00000073067	Noc3l	-0.957471	5.00998e-05
ENSMUSG00000073067	Nt5dc1	-0.964182	2.76491e-05
ENSMUSG00000073067	Nudt2	-0.951981	7.62142e-05
ENSMUSG00000073067	Osgepl1	-0.983278	1.95849e-06
ENSMUSG00000073067	Pcyt2	-0.959421	4.25938e-05
ENSMUSG00000073067	Pgls	-0.952492	7.34518e-05
ENSMUSG00000073067	Pkd1	0.951776	7.73413e-05
ENSMUSG00000073067	Pkp4	0.972621	1.0886e-05
ENSMUSG00000073067	Pot1a	-0.974328	8.70499e-06
ENSMUSG00000073067	Ppp2r2d	-0.950241	8.61755e-05
ENSMUSG00000073067	Prkaca	-0.973931	9.18209e-06
ENSMUSG00000073067	Psma2	-0.966733	2.14018e-05
ENSMUSG00000073067	Psma4	-0.967044	2.07152e-05
ENSMUSG00000073067	Psmc6	-0.954395	6.37797e-05
ENSMUSG00000073067	Ptcd2	-0.950299	8.58309e-05
ENSMUSG00000073067	Ptgfr	-0.966356	2.22548e-05
ENSMUSG00000073067	Ptprb	0.951503	7.88633e-05
ENSMUSG00000073067	Ramp2	0.97265	1.08469e-05
ENSMUSG00000073067	Rars2	-0.961535	3.53916e-05
ENSMUSG00000073067	Recql	-0.954012	6.5649e-05
ENSMUSG00000073067	Rell1	0.954194	6.47522e-05
ENSMUSG00000073067	Retnla	0.958884	4.45737e-05
ENSMUSG00000073067	Rfc4	-0.952137	7.53613e-05
ENSMUSG00000073067	Rhoj	0.954755	6.20555e-05
ENSMUSG00000073067	Rnf170	-0.96201	3.39032e-05
ENSMUSG00000073067	S1pr1	0.954557	6.29966e-05
ENSMUSG00000073067	Scfd1	-0.959808	4.12022e-05
ENSMUSG00000073067	Sema6a	0.968494	1.77221e-05
ENSMUSG00000073067	Ski	0.950407	8.51899e-05
ENSMUSG00000073067	Skiv2l2	-0.961718	3.48137e-05
ENSMUSG00000073067	Slc12a9	0.955605	5.81202e-05
ENSMUSG00000073067	Slc22a4	-0.961766	3.46621e-05
ENSMUSG00000073067	Slc25a17	-0.965374	2.45881e-05
ENSMUSG00000073067	Slc30a6	-0.950978	8.18519e-05
ENSMUSG00000073067	Slco2b1	0.960739	3.79919e-05
ENSMUSG00000073067	Snupn	-0.952299	7.44858e-05
ENSMUSG00000073067	St6galnac5	-0.969656	1.55561e-05
ENSMUSG00000073067	Synj2bp	-0.957891	4.84093e-05
ENSMUSG00000073067	Tatdn1	-0.977607	5.4128e-06
ENSMUSG00000073067	Tdp2	-0.953645	6.74729e-05
ENSMUSG00000073067	Tfb1m	-0.955143	6.02327e-05
ENSMUSG00000073067	Thumpd1	-0.986509	9.268e-07
ENSMUSG00000073067	Tie1	0.961952	3.40833e-05
ENSMUSG00000073067	Tm4sf1	0.969515	1.58095e-05
ENSMUSG00000073067	Tmem126a	-0.95376	6.68959e-05
ENSMUSG00000073067	Tmem18	-0.956482	5.42457e-05
ENSMUSG00000073067	Tmem184c	-0.96247	3.2501e-05
ENSMUSG00000073067	Tmem70	-0.951108	8.11014e-05
ENSMUSG00000073067	Tmf1	-0.967581	1.9568e-05
ENSMUSG00000073067	Trps1	-0.953026	7.06355e-05
ENSMUSG00000073067	Tshz2	0.950217	8.63221e-05
ENSMUSG00000073067	Tspan7	0.968388	1.79305e-05
ENSMUSG00000073067	Ttc38	-0.959981	4.05936e-05
ENSMUSG00000073067	Ufsp2	-0.95972	4.15147e-05
ENSMUSG00000073067	Vti1b	-0.966323	2.23297e-05
ENSMUSG00000073067	Wdr55	-0.95128	8.01256e-05
ENSMUSG00000073067	Wdr5b	-0.962766	3.16239e-05
ENSMUSG00000073067	Zdhhc2	-0.959485	4.23616e-05
ENSMUSG00000073067	Zeb2	-0.953464	6.83869e-05
ENSMUSG00000073067	Zfp277	-0.954273	6.43674e-05
ENSMUSG00000073067	Zmiz1	0.952736	7.2155e-05
ENSMUSG00000073067	Zyx	0.981914	2.57367e-06
ENSMUSG00000074071	Supt3h	-0.952587	7.29417e-05
ENSMUSG00000074146	Atp11a	0.950086	8.71055e-05
ENSMUSG00000074146	Cant1	0.972535	1.10056e-05
ENSMUSG00000074146	Dnali1	0.952703	7.23288e-05
ENSMUSG00000074146	Gemin5	-0.965547	2.41654e-05
ENSMUSG00000074146	Ints9	-0.951043	8.14751e-05
ENSMUSG00000074146	Kctd4	0.950507	8.45978e-05
ENSMUSG00000074146	Ldhc	0.982294	2.39034e-06
ENSMUSG00000074146	Mat2b	-0.951076	8.12875e-05
ENSMUSG00000074146	Mgmt	-0.971349	1.27456e-05
ENSMUSG00000074146	Nfyc	-0.957013	5.19907e-05
ENSMUSG00000074146	Nr2c2ap	-0.950454	8.49127e-05
ENSMUSG00000074146	Nup155	-0.964444	2.69531e-05
ENSMUSG00000074146	Olfr370	0.968471	1.77686e-05
ENSMUSG00000074146	Pls3	-0.970646	1.38654e-05
ENSMUSG00000074146	Pnrc2	-0.956522	5.40725e-05
ENSMUSG00000074146	Ppp1r7	-0.968701	1.7322e-05
ENSMUSG00000074146	Pramef8	-0.967548	1.96375e-05
ENSMUSG00000074146	Rabl3	-0.959314	4.29814e-05
ENSMUSG00000074146	Scaf1	0.9837	1.79176e-06
ENSMUSG00000074146	2016-09-02	-0.972876	1.05383e-05
ENSMUSG00000074146	Siah2	0.951865	7.685e-05
ENSMUSG00000074146	Slc25a38	-0.951174	8.07244e-05
ENSMUSG00000074146	Uspl1	-0.954461	6.34594e-05
ENSMUSG00000074146	Zswim1	-0.96249	3.2442e-05
ENSMUSG00000074415	1110007C09Rik	0.955789	5.72884e-05
ENSMUSG00000074415	2310002L09Rik	-0.958512	4.59847e-05
ENSMUSG00000074415	2700062C07Rik	-0.953072	7.04011e-05
ENSMUSG00000074415	Aard	-0.964085	2.79074e-05
ENSMUSG00000074415	Abhd6	-0.958848	4.47093e-05
ENSMUSG00000074415	Acaca	-0.957735	4.90318e-05
ENSMUSG00000074415	Acn9	-0.979243	4.15717e-06
ENSMUSG00000074415	Adcy4	0.958641	4.54906e-05
ENSMUSG00000074415	AI317395	-0.950458	8.48838e-05
ENSMUSG00000074415	AI607873	0.975193	7.72693e-06
ENSMUSG00000074415	Aim1	0.969082	1.66025e-05
ENSMUSG00000074415	Akap13	0.962663	3.19265e-05
ENSMUSG00000074415	Alg8	-0.961193	3.64931e-05
ENSMUSG00000074415	Alpk1	0.984674	1.44562e-06
ENSMUSG00000074415	Aqp1	0.958972	4.42461e-05
ENSMUSG00000074415	Arhgap10	0.952665	7.25309e-05
ENSMUSG00000074415	Arhgap24	-0.959475	4.23979e-05
ENSMUSG00000074415	Arhgef37	-0.958153	4.73747e-05
ENSMUSG00000074415	Armcx5	-0.9634	2.97954e-05
ENSMUSG00000074415	B3galtl	-0.950969	8.19017e-05
ENSMUSG00000074415	B4galt5	0.954525	6.31535e-05
ENSMUSG00000074415	Bat2l2	0.953486	6.8278e-05
ENSMUSG00000074415	Bcl2l1	0.956066	5.60569e-05
ENSMUSG00000074415	Bcl6b	0.968263	1.81775e-05
ENSMUSG00000074415	Bcs1l	-0.951156	8.08318e-05
ENSMUSG00000074415	C1galt1c1	-0.954793	6.18767e-05
ENSMUSG00000074415	C5ar1	0.990589	2.63827e-07
ENSMUSG00000074415	Cbr3	0.950421	8.51076e-05
ENSMUSG00000074415	Ccl9	0.95603	5.62156e-05
ENSMUSG00000074415	Cd74	0.954191	6.4767e-05
ENSMUSG00000074415	Cd93	0.976316	6.57765e-06
ENSMUSG00000074415	Cdc27	-0.970464	1.41659e-05
ENSMUSG00000074415	Cdh5	0.971457	1.25802e-05
ENSMUSG00000074415	Csf2rb	0.971232	1.29276e-05
ENSMUSG00000074415	Cxcl16	0.977321	5.65683e-06
ENSMUSG00000074415	Cxcr7	0.97702	5.92294e-06
ENSMUSG00000074415	Dab2	0.952513	7.33359e-05
ENSMUSG00000074415	Ddx17	0.971292	1.28345e-05
ENSMUSG00000074415	Ddx3y	-0.952616	7.27874e-05
ENSMUSG00000074415	Dhcr7	-0.955066	6.05942e-05
ENSMUSG00000074415	Dhx29	-0.964491	2.68299e-05
ENSMUSG00000074415	Dis3l	-0.959322	4.29521e-05
ENSMUSG00000074415	Ednrb	0.961378	3.58943e-05
ENSMUSG00000074415	Elovl6	-0.957631	4.94533e-05
ENSMUSG00000074415	Emp2	0.972302	1.13336e-05
ENSMUSG00000074415	Esf1	-0.964999	2.55226e-05
ENSMUSG00000074415	Etl4	0.95847	4.61448e-05
ENSMUSG00000074415	Ets1	0.98148	2.7956e-06
ENSMUSG00000074415	Fam43a	0.959968	4.06379e-05
ENSMUSG00000074415	Fgd5	0.965508	2.4261e-05
ENSMUSG00000074415	Fgl2	0.958463	4.61744e-05
ENSMUSG00000074415	Fkbp2	0.955005	6.08794e-05
ENSMUSG00000074415	Flnb	0.957108	5.15965e-05
ENSMUSG00000074415	Fxr1	-0.951256	8.02614e-05
ENSMUSG00000074415	Gas6	0.971386	1.26886e-05
ENSMUSG00000074415	Gfm1	-0.951864	7.68564e-05
ENSMUSG00000074415	Gm12942	0.963583	2.92835e-05
ENSMUSG00000074415	Gpr89	-0.956194	5.54943e-05
ENSMUSG00000074415	Grn	0.974408	8.61096e-06
ENSMUSG00000074415	H2-Eb1	0.960348	3.93205e-05
ENSMUSG00000074415	Hes1	-0.952505	7.33781e-05
ENSMUSG00000074415	Hnmt	-0.950497	8.46583e-05
ENSMUSG00000074415	Hoxa9	-0.964917	2.5732e-05
ENSMUSG00000074415	Icam2	0.950028	8.74588e-05
ENSMUSG00000074415	Igf1	-0.950861	8.2528e-05
ENSMUSG00000074415	Il22ra2	-0.951553	7.85859e-05
ENSMUSG00000074415	Ina	-0.955174	6.009e-05
ENSMUSG00000074415	Inmt	0.967535	1.96654e-05
ENSMUSG00000074415	Ints10	-0.960633	3.83492e-05
ENSMUSG00000074415	Itpkb	0.951235	8.03805e-05
ENSMUSG00000074415	Katnal2	-0.972331	1.12914e-05
ENSMUSG00000074415	Kcnq4	-0.961783	3.46075e-05
ENSMUSG00000074415	Kctd12b	-0.982143	2.46229e-06
ENSMUSG00000074415	Kdr	0.970892	1.34649e-05
ENSMUSG00000074415	Klf3	0.965648	2.39208e-05
ENSMUSG00000074415	L3mbtl2	-0.950057	8.72803e-05
ENSMUSG00000074415	Lmo7	0.95992	4.08084e-05
ENSMUSG00000074415	Lpl	-0.953608	6.766e-05
ENSMUSG00000074415	Mfsd8	-0.957077	5.17245e-05
ENSMUSG00000074415	Mll1	0.950821	8.27578e-05
ENSMUSG00000074415	Mme	-0.97064	1.38752e-05
ENSMUSG00000074415	Mtap9	-0.975492	7.40835e-06
ENSMUSG00000074415	Mup1	-0.963404	2.97864e-05
ENSMUSG00000074415	Mup2	-0.951576	7.84552e-05
ENSMUSG00000074415	Myh9	0.972145	1.15572e-05
ENSMUSG00000074415	Myl6	0.966806	2.12392e-05
ENSMUSG00000074415	Nav1	0.952516	7.33216e-05
ENSMUSG00000074415	Ndrg1	0.956201	5.54634e-05
ENSMUSG00000074415	Ndufaf2	-0.962874	3.13074e-05
ENSMUSG00000074415	Ndufs1	-0.963402	2.979e-05
ENSMUSG00000074415	Nipsnap3b	-0.958343	4.66348e-05
ENSMUSG00000074415	Noc3l	-0.97935	4.08343e-06
ENSMUSG00000074415	Notch3	0.962977	3.10074e-05
ENSMUSG00000074415	Npc1	0.970166	1.46676e-05
ENSMUSG00000074415	Ola1	-0.955504	5.85778e-05
ENSMUSG00000074415	Oxsm	-0.954683	6.23954e-05
ENSMUSG00000074415	Parm1	-0.967406	1.99368e-05
ENSMUSG00000074415	Pdha1	-0.957744	4.89985e-05
ENSMUSG00000074415	Pecam1	0.951779	7.73263e-05
ENSMUSG00000074415	Pex11a	-0.957619	4.94983e-05
ENSMUSG00000074415	Pf4	0.952016	7.60206e-05
ENSMUSG00000074415	Phf12	0.950051	8.73168e-05
ENSMUSG00000074415	Pitpnc1	0.970328	1.43939e-05
ENSMUSG00000074415	Pkd1	0.968595	1.75269e-05
ENSMUSG00000074415	Plaa	-0.986976	8.19651e-07
ENSMUSG00000074415	Plekho2	0.965726	2.37341e-05
ENSMUSG00000074415	Pon3	-0.961208	3.64437e-05
ENSMUSG00000074415	Ppargc1a	-0.979801	3.78091e-06
ENSMUSG00000074415	Ppp1r12c	0.964862	2.58706e-05
ENSMUSG00000074415	Prdm1	0.977766	5.2804e-06
ENSMUSG00000074415	Ptgfr	-0.950619	8.39365e-05
ENSMUSG00000074415	Ptprb	0.953191	6.97852e-05
ENSMUSG00000074415	Rab43	0.970138	1.47162e-05
ENSMUSG00000074415	Rasal2	0.951948	7.63953e-05
ENSMUSG00000074415	Rgs7	-0.952726	7.2208e-05
ENSMUSG00000074415	Rhoj	0.969858	1.52008e-05
ENSMUSG00000074415	Ripk3	0.960693	3.81472e-05
ENSMUSG00000074415	Rnf170	-0.95088	8.24186e-05
ENSMUSG00000074415	Rnf220	0.950745	8.32026e-05
ENSMUSG00000074415	Robo4	0.970858	1.35198e-05
ENSMUSG00000074415	Rpp40	-0.951749	7.74923e-05
ENSMUSG00000074415	Rps6ka3	-0.965023	2.54621e-05
ENSMUSG00000074415	Rrn3	-0.965795	2.35678e-05
ENSMUSG00000074415	Rufy3	0.955428	5.89219e-05
ENSMUSG00000074415	S1pr1	0.97317	1.01466e-05
ENSMUSG00000074415	S1pr3	0.962655	3.19499e-05
ENSMUSG00000074415	Sc5d	-0.95427	6.43845e-05
ENSMUSG00000074415	Scoc	-0.953957	6.59203e-05
ENSMUSG00000074415	Secisbp2l	-0.951258	8.02458e-05
ENSMUSG00000074415	Sema6a	0.953873	6.63326e-05
ENSMUSG00000074415	Sfswap	0.951525	7.87395e-05
ENSMUSG00000074415	Sgtb	-0.987589	6.92882e-07
ENSMUSG00000074415	Sh2b3	0.972194	1.14876e-05
ENSMUSG00000074415	Siglec1	0.964926	2.57099e-05
ENSMUSG00000074415	Slc16a6	0.957428	5.02751e-05
ENSMUSG00000074415	Slc44a2	0.951853	7.69166e-05
ENSMUSG00000074415	Slco2b1	0.962908	3.12082e-05
ENSMUSG00000074415	Slfn2	0.963427	2.97191e-05
ENSMUSG00000074415	Snord15b	0.958594	4.56718e-05
ENSMUSG00000074415	Snord95	0.95453	6.31256e-05
ENSMUSG00000074415	Spata13	0.962166	3.34215e-05
ENSMUSG00000074415	Spry1	0.971607	1.2352e-05
ENSMUSG00000074415	Srrm2	0.954404	6.37358e-05
ENSMUSG00000074415	Stambp	-0.957036	5.18963e-05
ENSMUSG00000074415	Suclg2	-0.953197	6.97559e-05
ENSMUSG00000074415	Tbc1d15	-0.969218	1.63493e-05
ENSMUSG00000074415	Tcf21	0.950135	8.68098e-05
ENSMUSG00000074415	Thnsl1	-0.956063	5.60736e-05
ENSMUSG00000074415	Tm4sf1	0.964717	2.62437e-05
ENSMUSG00000074415	Tmem135	-0.958598	4.56567e-05
ENSMUSG00000074415	Tmem150b	0.950774	8.30315e-05
ENSMUSG00000074415	Tmem86a	0.955958	5.65384e-05
ENSMUSG00000074415	Tmem88	0.952606	7.28405e-05
ENSMUSG00000074415	Tnfrsf11a	0.961937	3.41273e-05
ENSMUSG00000074415	Trafd1	0.971175	1.3017e-05
ENSMUSG00000074415	Trim69	-0.964289	2.73624e-05
ENSMUSG00000074415	Tspan7	0.963006	3.09228e-05
ENSMUSG00000074415	Uba3	-0.95397	6.58554e-05
ENSMUSG00000074415	Ugp2	-0.955077	6.05427e-05
ENSMUSG00000074415	Upf2	-0.969335	1.61349e-05
ENSMUSG00000074415	Uqcrc2	-0.955016	6.08261e-05
ENSMUSG00000074415	Wdfy3	0.95665	5.35232e-05
ENSMUSG00000074415	Wdr1	0.960492	3.88274e-05
ENSMUSG00000074415	Wt1	0.974628	8.35648e-06
ENSMUSG00000074415	Ypel3	0.963337	2.99751e-05
ENSMUSG00000074415	Zdhhc18	0.951428	7.92846e-05
ENSMUSG00000074415	Zmiz2	0.953373	6.88502e-05
ENSMUSG00000079407	5430437P03Rik	-0.960055	4.03334e-05
ENSMUSG00000079407	Acot7	-0.971304	1.28148e-05
ENSMUSG00000079407	Ankrd11	0.961318	3.60874e-05
ENSMUSG00000079407	Ap3s2	-0.97995	3.68534e-06
ENSMUSG00000079407	Brms1l	-0.957568	4.97046e-05
ENSMUSG00000079407	Cdc23	-0.977951	5.12915e-06
ENSMUSG00000079407	D030074E01Rik	-0.96277	3.16117e-05
ENSMUSG00000079407	D17Wsu104e	-0.951295	8.0037e-05
ENSMUSG00000079407	Dhdds	-0.955294	5.95371e-05
ENSMUSG00000079407	Eif3b	-0.951053	8.14189e-05
ENSMUSG00000079407	Eif5a	-0.964503	2.67984e-05
ENSMUSG00000079407	Exoc3	-0.953212	6.96764e-05
ENSMUSG00000079407	Fam114a2	-0.95822	4.71124e-05
ENSMUSG00000079407	Fam175b	-0.960487	3.88424e-05
ENSMUSG00000079407	Gosr1	-0.969177	1.64244e-05
ENSMUSG00000079407	Hsbp1	-0.960859	3.75924e-05
ENSMUSG00000079407	Mavs	-0.970279	1.44757e-05
ENSMUSG00000079407	Mea1	-0.951947	7.64013e-05
ENSMUSG00000079407	Mlx	-0.954501	6.32663e-05
ENSMUSG00000079407	Nutf2	-0.953748	6.69554e-05
ENSMUSG00000079407	Pank2	-0.961937	3.41281e-05
ENSMUSG00000079407	Phkg2	-0.95337	6.88695e-05
ENSMUSG00000079407	Pomp	-0.954498	6.32825e-05
ENSMUSG00000079407	Ppdpf	-0.961736	3.47551e-05
ENSMUSG00000079407	Rab11a	-0.995031	2.83336e-08
ENSMUSG00000079407	Rab35	-0.978717	4.53579e-06
ENSMUSG00000079407	Rbbp9	-0.960359	3.92809e-05
ENSMUSG00000079407	Rnf141	-0.957152	5.14099e-05
ENSMUSG00000079407	Rpl17	-0.952887	7.13599e-05
ENSMUSG00000079407	S100a11	-0.965552	2.41522e-05
ENSMUSG00000079407	Sarnp	-0.95129	8.00663e-05
ENSMUSG00000079407	Sdc2	-0.955786	5.7301e-05
ENSMUSG00000079407	Ssr3	-0.987694	6.7262e-07
ENSMUSG00000079407	Stip1	-0.977111	5.84189e-06
ENSMUSG00000079407	Stk35	0.969649	1.55684e-05
ENSMUSG00000079407	Sub1	-0.957679	4.92575e-05
ENSMUSG00000079407	Tada1	-0.9609	3.74578e-05
ENSMUSG00000079407	Tpi1	-0.951452	7.91496e-05
ENSMUSG00000079407	Trmt2b	-0.970371	1.43203e-05
ENSMUSG00000079407	Uba52	-0.962814	3.14822e-05
ENSMUSG00000079407	Ube2l3	-0.959024	4.40526e-05
ENSMUSG00000079407	Ubxn2b	-0.953268	6.93895e-05
ENSMUSG00000079407	Vac14	-0.957526	4.98786e-05
ENSMUSG00000079407	Zfp235	-0.981083	3.00973e-06
ENSMUSG00000085385	3010026O09Rik	-0.950616	8.39536e-05
ENSMUSG00000085385	Ak3	-0.953037	7.05794e-05
ENSMUSG00000085385	AW549877	-0.989934	3.33591e-07
ENSMUSG00000085385	Cs	-0.966486	2.19581e-05
ENSMUSG00000085385	Gsta3	-0.952855	7.15274e-05
ENSMUSG00000085385	Hspb6	-0.957004	5.20279e-05
ENSMUSG00000085385	Immt	-0.973024	1.03401e-05
ENSMUSG00000085385	Lpcat3	-0.957611	4.95303e-05
ENSMUSG00000085385	Lrrfip1	0.957169	5.13416e-05
ENSMUSG00000085385	Metrnl	0.958721	4.51876e-05
ENSMUSG00000085385	Mocs1	-0.960905	3.74415e-05
ENSMUSG00000085385	Mrs2	-0.950116	8.69272e-05
ENSMUSG00000085385	Oxsr1	-0.957099	5.16325e-05
ENSMUSG00000085385	Pam16	-0.952602	7.28644e-05
ENSMUSG00000085385	Pex3	-0.96282	3.14647e-05
ENSMUSG00000085385	Pgd	-0.951409	7.93928e-05
ENSMUSG00000085385	Rtn2	-0.971613	1.23431e-05
ENSMUSG00000085385	Sema3c	-0.965194	2.50356e-05
ENSMUSG00000085385	Slc35b4	-0.950897	8.23189e-05
ENSMUSG00000085385	Slc37a1	0.959983	4.05859e-05
ENSMUSG00000085385	Snord15b	0.951767	7.73947e-05
ENSMUSG00000085385	Thnsl2	-0.961176	3.65481e-05
ENSMUSG00000085385	Tshr	-0.971611	1.23461e-05
ENSMUSG00000085998	2010001K21Rik	0.970609	1.3926e-05
ENSMUSG00000085998	Brcc3	-0.951378	7.95689e-05
ENSMUSG00000085998	Ccdc43	-0.957878	4.84626e-05
ENSMUSG00000085998	Orc6	-0.961717	3.48177e-05
ENSMUSG00000085998	Ptgr1	-0.965267	2.48528e-05
ENSMUSG00000085998	Smc6	-0.984405	1.53609e-06
ENSMUSG00000085998	Thyn1	-0.970795	1.36217e-05
ENSMUSG00000086712	1190002A17Rik	0.955204	5.99508e-05
ENSMUSG00000086712	6030429G01Rik	0.963835	2.85865e-05
ENSMUSG00000086712	9930111J21Rik2	0.955694	5.77158e-05
ENSMUSG00000086712	Airn	0.953904	6.61787e-05
ENSMUSG00000086712	AK129341	-0.951581	7.84249e-05
ENSMUSG00000086712	Asap3	0.956388	5.465e-05
ENSMUSG00000086712	Atrn	-0.951788	7.72773e-05
ENSMUSG00000086712	B9d1	0.962397	3.2721e-05
ENSMUSG00000086712	Bank1	0.961707	3.48464e-05
ENSMUSG00000086712	BC096441	0.973206	1.00995e-05
ENSMUSG00000086712	Bnc1	0.968801	1.71315e-05
ENSMUSG00000086712	Cass4	0.983113	2.02701e-06
ENSMUSG00000086712	Cdkl2	-0.963468	2.9605e-05
ENSMUSG00000086712	Creld2	0.95074	8.32291e-05
ENSMUSG00000086712	Cxcr3	0.962006	3.39144e-05
ENSMUSG00000086712	Cygb	0.956751	5.30959e-05
ENSMUSG00000086712	Cysltr1	0.953307	6.91882e-05
ENSMUSG00000086712	Egflam	0.951833	7.70248e-05
ENSMUSG00000086712	Enpp1	0.966297	2.23902e-05
ENSMUSG00000086712	F3	-0.95583	5.71052e-05
ENSMUSG00000086712	Faim3	0.953266	6.93997e-05
ENSMUSG00000086712	Fam180a	0.965691	2.38176e-05
ENSMUSG00000086712	Fgf10	-0.951614	7.82428e-05
ENSMUSG00000086712	Fgf18	0.960753	3.79463e-05
ENSMUSG00000086712	Flt3l	0.968128	1.84484e-05
ENSMUSG00000086712	Gas1	0.957472	5.00969e-05
ENSMUSG00000086712	Gbp4	0.961285	3.6196e-05
ENSMUSG00000086712	Gfpt1	-0.953119	7.01547e-05
ENSMUSG00000086712	Ggta1	0.950908	8.22543e-05
ENSMUSG00000086712	Gimap3	0.950142	8.67672e-05
ENSMUSG00000086712	Gpc4	-0.976283	6.60968e-06
ENSMUSG00000086712	Gpr183	0.958497	4.60433e-05
ENSMUSG00000086712	Hdgfrp2	0.964867	2.58594e-05
ENSMUSG00000086712	Ikbkb	0.958418	4.63453e-05
ENSMUSG00000086712	Itm2c	0.965895	2.33287e-05
ENSMUSG00000086712	Kmo	0.965672	2.3863e-05
ENSMUSG00000086712	Lgi4	0.967527	1.96818e-05
ENSMUSG00000086712	Lime1	0.953635	6.75244e-05
ENSMUSG00000086712	Limk1	0.955746	5.74816e-05
ENSMUSG00000086712	Ly6d	0.963311	3.0049e-05
ENSMUSG00000086712	2016-03-03	-0.957422	5.03012e-05
ENSMUSG00000086712	Met	-0.957171	5.1333e-05
ENSMUSG00000086712	Mical1	0.954011	6.56532e-05
ENSMUSG00000086712	Mmgt1	-0.971497	1.2519e-05
ENSMUSG00000086712	Mmp11	0.950598	8.40609e-05
ENSMUSG00000086712	Nes	0.958229	4.70783e-05
ENSMUSG00000086712	Nfatc2	0.950662	8.36885e-05
ENSMUSG00000086712	P2ry13	0.98746	7.18206e-07
ENSMUSG00000086712	Ppl	0.966201	2.26126e-05
ENSMUSG00000086712	Ppp2r3a	-0.966383	2.21933e-05
ENSMUSG00000086712	Prdm5	0.956259	5.52138e-05
ENSMUSG00000086712	Prkd1	-0.958862	4.46576e-05
ENSMUSG00000086712	Ptpro	0.961814	3.45111e-05
ENSMUSG00000086712	Rab11fip5	0.982816	2.15357e-06
ENSMUSG00000086712	Rab8b	0.955782	5.73214e-05
ENSMUSG00000086712	Ranbp9	-0.951461	7.91024e-05
ENSMUSG00000086712	Rftn1	0.955605	5.81182e-05
ENSMUSG00000086712	Rgs7bp	-0.954192	6.47625e-05
ENSMUSG00000086712	Scara3	0.952909	7.12473e-05
ENSMUSG00000086712	Scarf2	0.970041	1.48815e-05
ENSMUSG00000086712	Senp5	-0.956726	5.32004e-05
ENSMUSG00000086712	2016-09-01	0.955934	5.66415e-05
ENSMUSG00000086712	Serpinb8	0.953893	6.62341e-05
ENSMUSG00000086712	Sgcd	-0.953947	6.59667e-05
ENSMUSG00000086712	Sigirr	0.953944	6.59832e-05
ENSMUSG00000086712	Slc9a3r1	0.961761	3.46782e-05
ENSMUSG00000086712	St6galnac4	0.958508	4.60018e-05
ENSMUSG00000086712	Stard8	0.972211	1.1463e-05
ENSMUSG00000086712	Tbc1d4	-0.955217	5.98916e-05
ENSMUSG00000086712	Ticam2	0.98267	2.21824e-06
ENSMUSG00000086712	Tmem181a	0.971575	1.24007e-05
ENSMUSG00000086712	Tmem48	-0.951039	8.14992e-05
ENSMUSG00000086712	Zdhhc1	0.956807	5.28579e-05
ENSMUSG00000086788	Il9	0.958065	4.77202e-05
ENSMUSG00000086788	Olfr398	0.950087	8.71027e-05
ENSMUSG00000086788	Rpl36al	-0.965986	2.31158e-05
ENSMUSG00000086859	1110031I02Rik	-0.964216	2.75578e-05
ENSMUSG00000086859	2010110P09Rik	0.960737	3.80015e-05
ENSMUSG00000086859	2510012J08Rik	0.952946	7.10533e-05
ENSMUSG00000086859	2900062L11Rik	-0.97261	1.09012e-05
ENSMUSG00000086859	4930466F19Rik	0.976644	6.2667e-06
ENSMUSG00000086859	4930578C19Rik	0.979528	3.96222e-06
ENSMUSG00000086859	6530401D17Rik	-0.952439	7.37335e-05
ENSMUSG00000086859	9930111J21Rik2	0.955768	5.7386e-05
ENSMUSG00000086859	A530099J19Rik	0.970863	1.35125e-05
ENSMUSG00000086859	Abca8a	0.977919	5.15479e-06
ENSMUSG00000086859	Abca9	0.960827	3.77003e-05
ENSMUSG00000086859	Abcc4	0.959778	4.13088e-05
ENSMUSG00000086859	Abcd3	-0.970767	1.3668e-05
ENSMUSG00000086859	Abr	0.955177	6.00776e-05
ENSMUSG00000086859	Ace	0.957377	5.04844e-05
ENSMUSG00000086859	Acin1	0.966989	2.08368e-05
ENSMUSG00000086859	Acyp2	-0.967683	1.93553e-05
ENSMUSG00000086859	Agtrap	0.974275	8.76746e-06
ENSMUSG00000086859	Aldh1a3	0.970923	1.34154e-05
ENSMUSG00000086859	Amy1	-0.989433	3.95286e-07
ENSMUSG00000086859	Ankrd10	0.960098	4.01824e-05
ENSMUSG00000086859	Ankrd23	0.958982	4.42087e-05
ENSMUSG00000086859	Ano10	-0.958424	4.63245e-05
ENSMUSG00000086859	Antxr1	0.964438	2.69684e-05
ENSMUSG00000086859	Anxa3	0.965124	2.52086e-05
ENSMUSG00000086859	Apol9a	0.960501	3.87978e-05
ENSMUSG00000086859	Arhgap31	0.963842	2.85677e-05
ENSMUSG00000086859	Arntl2	-0.953304	6.9203e-05
ENSMUSG00000086859	Art3	-0.955334	5.93514e-05
ENSMUSG00000086859	Atp6v1h	-0.953942	6.59909e-05
ENSMUSG00000086859	Atp8b2	0.966869	2.10995e-05
ENSMUSG00000086859	Axl	0.963749	2.88233e-05
ENSMUSG00000086859	Bank1	0.961307	3.61257e-05
ENSMUSG00000086859	Bnip3	-0.968461	1.77877e-05
ENSMUSG00000086859	Btbd3	0.96344	2.96852e-05
ENSMUSG00000086859	C1rb	0.955334	5.93547e-05
ENSMUSG00000086859	C3	0.953893	6.62366e-05
ENSMUSG00000086859	C330018D20Rik	-0.953137	7.00642e-05
ENSMUSG00000086859	C630004H02Rik	0.974469	8.53939e-06
ENSMUSG00000086859	C7	0.970327	1.43948e-05
ENSMUSG00000086859	Cacng7	-0.951648	7.8053e-05
ENSMUSG00000086859	Calcrl	0.955508	5.85589e-05
ENSMUSG00000086859	Camk1d	0.980617	3.27537e-06
ENSMUSG00000086859	Capg	0.970249	1.45264e-05
ENSMUSG00000086859	Caprin2	-0.974678	8.29954e-06
ENSMUSG00000086859	Ccbl2	-0.966039	2.29912e-05
ENSMUSG00000086859	Ccl21a	0.962812	3.1489e-05
ENSMUSG00000086859	Ccl8	0.974838	8.11869e-06
ENSMUSG00000086859	Ccr2	0.966663	2.1559e-05
ENSMUSG00000086859	Cd209a	0.974655	8.32604e-06
ENSMUSG00000086859	Cd209g	0.958956	4.43065e-05
ENSMUSG00000086859	Cd37	0.950332	8.56353e-05
ENSMUSG00000086859	Cd3g	0.960082	4.02385e-05
ENSMUSG00000086859	Cd68	0.967139	2.05089e-05
ENSMUSG00000086859	Cd80	0.956073	5.60257e-05
ENSMUSG00000086859	Cdc42se2	0.964309	2.73105e-05
ENSMUSG00000086859	Cdon	0.958529	4.59181e-05
ENSMUSG00000086859	Cfh	0.970659	1.38431e-05
ENSMUSG00000086859	Clec2d	0.95689	5.25074e-05
ENSMUSG00000086859	Cln3	0.951829	7.70478e-05
ENSMUSG00000086859	Clpx	-0.977675	5.35571e-06
ENSMUSG00000086859	Cnnm2	-0.965524	2.42205e-05
ENSMUSG00000086859	Coro1c	0.959504	4.22901e-05
ENSMUSG00000086859	Cpa3	0.955695	5.7712e-05
ENSMUSG00000086859	Cpxm2	0.96127	3.62449e-05
ENSMUSG00000086859	Crip1	0.965979	2.31317e-05
ENSMUSG00000086859	Ctsh	0.957836	4.8628e-05
ENSMUSG00000086859	Cygb	0.963863	2.85106e-05
ENSMUSG00000086859	Cyp4b1	0.983567	1.84333e-06
ENSMUSG00000086859	Cysltr1	0.968152	1.83995e-05
ENSMUSG00000086859	Cyth4	0.95189	7.67128e-05
ENSMUSG00000086859	D2hgdh	-0.957551	4.97752e-05
ENSMUSG00000086859	Dcn	0.95597	5.64819e-05
ENSMUSG00000086859	Ddr2	0.952814	7.17466e-05
ENSMUSG00000086859	Dnajb14	-0.958738	4.51248e-05
ENSMUSG00000086859	Dnase1l2	0.962421	3.26491e-05
ENSMUSG00000086859	Dpep1	0.963642	2.91195e-05
ENSMUSG00000086859	Dpep2	0.963225	3.02924e-05
ENSMUSG00000086859	Dpysl2	0.962237	3.32049e-05
ENSMUSG00000086859	Edn1	0.957495	5.00029e-05
ENSMUSG00000086859	Efemp1	0.954965	6.1063e-05
ENSMUSG00000086859	Efna1	0.957155	5.13995e-05
ENSMUSG00000086859	Egfl7	0.954048	6.54707e-05
ENSMUSG00000086859	Ehd4	0.968168	1.83665e-05
ENSMUSG00000086859	Elk3	0.953874	6.63288e-05
ENSMUSG00000086859	Enpp3	0.958947	4.43397e-05
ENSMUSG00000086859	Eny2	-0.950801	8.28769e-05
ENSMUSG00000086859	Ephb4	0.984227	1.59807e-06
ENSMUSG00000086859	Eps15l1	0.957983	4.80444e-05
ENSMUSG00000086859	Etf1	-0.950938	8.20826e-05
ENSMUSG00000086859	F3	-0.966215	2.25804e-05
ENSMUSG00000086859	Fam189a2	0.974082	8.99745e-06
ENSMUSG00000086859	Fbln1	0.971764	1.21164e-05
ENSMUSG00000086859	Fbln2	0.959392	4.26981e-05
ENSMUSG00000086859	Fcrls	0.975605	7.29051e-06
ENSMUSG00000086859	Flrt2	0.952406	7.39073e-05
ENSMUSG00000086859	Flt3l	0.954577	6.29014e-05
ENSMUSG00000086859	Fnbp1	0.967058	2.06862e-05
ENSMUSG00000086859	Fndc3a	0.956469	5.42999e-05
ENSMUSG00000086859	Fst	0.957235	5.10685e-05
ENSMUSG00000086859	Gabra3	0.963173	3.04411e-05
ENSMUSG00000086859	Gadd45a	-0.9704	1.42715e-05
ENSMUSG00000086859	Gadd45g	-0.957034	5.19017e-05
ENSMUSG00000086859	Gas1	0.977137	5.81839e-06
ENSMUSG00000086859	Ggct	-0.981209	2.94056e-06
ENSMUSG00000086859	Gja5	0.967235	2.03024e-05
ENSMUSG00000086859	Gm16848	0.95147	7.90493e-05
ENSMUSG00000086859	Gm9975	-0.961867	3.43468e-05
ENSMUSG00000086859	Gnb4	-0.977799	5.25303e-06
ENSMUSG00000086859	Gpc4	-0.961354	3.59718e-05
ENSMUSG00000086859	Herpud1	0.964449	2.6942e-05
ENSMUSG00000086859	Hibch	-0.9688	1.71331e-05
ENSMUSG00000086859	Hic1	0.985634	1.15366e-06
ENSMUSG00000086859	Hspd1	-0.967578	1.95749e-05
ENSMUSG00000086859	Iars2	-0.974171	8.89085e-06
ENSMUSG00000086859	Ifitm3	0.970135	1.47199e-05
ENSMUSG00000086859	Igfbp7	0.968106	1.84924e-05
ENSMUSG00000086859	Igl-V2	0.95781	4.87328e-05
ENSMUSG00000086859	Ikbkb	0.968277	1.81503e-05
ENSMUSG00000086859	Il10ra	0.970046	1.48733e-05
ENSMUSG00000086859	Isyna1	0.9599	4.08769e-05
ENSMUSG00000086859	Itgb7	0.957765	4.89128e-05
ENSMUSG00000086859	Itgbl1	0.963951	2.82724e-05
ENSMUSG00000086859	Itpr3	0.959188	4.34456e-05
ENSMUSG00000086859	Kcnt2	0.960764	3.79088e-05
ENSMUSG00000086859	Klri1	0.9542	6.4726e-05
ENSMUSG00000086859	Leprel2	0.958922	4.44337e-05
ENSMUSG00000086859	Lgi2	0.968917	1.69105e-05
ENSMUSG00000086859	Limk1	0.95461	6.27421e-05
ENSMUSG00000086859	Lmo4	-0.969387	1.60407e-05
ENSMUSG00000086859	Lonp1	-0.962818	3.14711e-05
ENSMUSG00000086859	Loxl1	0.953091	7.03012e-05
ENSMUSG00000086859	Lpar1	0.956614	5.36763e-05
ENSMUSG00000086859	Lpcat1	0.951461	7.91015e-05
ENSMUSG00000086859	Lrig1	-0.960485	3.88493e-05
ENSMUSG00000086859	Lrrc49	0.951441	7.92154e-05
ENSMUSG00000086859	Ltbp1	0.958381	4.64899e-05
ENSMUSG00000086859	Ly6a	0.961861	3.43661e-05
ENSMUSG00000086859	Ly6c1	0.970091	1.47957e-05
ENSMUSG00000086859	Lyrm5	-0.970801	1.36116e-05
ENSMUSG00000086859	Map3k3	0.951365	7.96444e-05
ENSMUSG00000086859	Map4k1	0.964522	2.67497e-05
ENSMUSG00000086859	2016-03-03	-0.969114	1.65427e-05
ENSMUSG00000086859	2016-03-05	-0.966597	2.17074e-05
ENSMUSG00000086859	Mcpt4	0.959004	4.41249e-05
ENSMUSG00000086859	Mef2c	0.958425	4.63198e-05
ENSMUSG00000086859	Mgp	0.955668	5.78333e-05
ENSMUSG00000086859	Mical1	0.950081	8.71363e-05
ENSMUSG00000086859	Mkl2	0.952144	7.53218e-05
ENSMUSG00000086859	Mmrn2	0.955168	6.0119e-05
ENSMUSG00000086859	Mobkl2b	-0.95368	6.72978e-05
ENSMUSG00000086859	Ms4a14	0.955325	5.93961e-05
ENSMUSG00000086859	Ms4a4d	0.972541	1.09968e-05
ENSMUSG00000086859	Ms4a6b	0.953254	6.94624e-05
ENSMUSG00000086859	Ms4a8a	0.96078	3.78554e-05
ENSMUSG00000086859	Myh11	0.952123	7.54404e-05
ENSMUSG00000086859	Myl9	0.96557	2.41099e-05
ENSMUSG00000086859	Nceh1	0.959036	4.40083e-05
ENSMUSG00000086859	Nova1	0.951418	7.93418e-05
ENSMUSG00000086859	Nphp1	-0.952719	7.2246e-05
ENSMUSG00000086859	Npy1r	0.972128	1.15826e-05
ENSMUSG00000086859	Nr1h4	0.965969	2.31538e-05
ENSMUSG00000086859	P2rx7	0.952753	7.20636e-05
ENSMUSG00000086859	Pcdh11x	0.960048	4.03582e-05
ENSMUSG00000086859	Pcolce	0.968922	1.69025e-05
ENSMUSG00000086859	Pde3a	0.970562	1.40034e-05
ENSMUSG00000086859	Pdgfra	0.96242	3.26521e-05
ENSMUSG00000086859	Pdgfrb	0.962631	3.20211e-05
ENSMUSG00000086859	Penk	0.951651	7.80382e-05
ENSMUSG00000086859	Pex13	-0.978395	4.77885e-06
ENSMUSG00000086859	Pgm5	0.970292	1.44533e-05
ENSMUSG00000086859	Phldb2	0.951384	7.95329e-05
ENSMUSG00000086859	Pip4k2a	0.952726	7.2208e-05
ENSMUSG00000086859	Pla1a	0.962561	3.22284e-05
ENSMUSG00000086859	Plac9	0.978345	4.81706e-06
ENSMUSG00000086859	Plekho1	0.962125	3.35474e-05
ENSMUSG00000086859	Plvap	0.954673	6.24464e-05
ENSMUSG00000086859	Plxdc2	0.953795	6.67236e-05
ENSMUSG00000086859	Plxnb2	0.965649	2.39194e-05
ENSMUSG00000086859	Pnpla8	-0.969016	1.67256e-05
ENSMUSG00000086859	Ppp1r14a	0.953383	6.88032e-05
ENSMUSG00000086859	Prcp	0.952238	7.48137e-05
ENSMUSG00000086859	Prkacb	0.954856	6.15787e-05
ENSMUSG00000086859	Psap	0.957826	4.86701e-05
ENSMUSG00000086859	Psma1	-0.954045	6.54852e-05
ENSMUSG00000086859	Ptplad2	0.980548	3.31659e-06
ENSMUSG00000086859	Pyhin1	0.952203	7.50054e-05
ENSMUSG00000086859	Rab8b	0.968253	1.81968e-05
ENSMUSG00000086859	Rab9	-0.955731	5.75521e-05
ENSMUSG00000086859	Rbm5	0.976132	6.75747e-06
ENSMUSG00000086859	Rbp1	0.977205	5.75873e-06
ENSMUSG00000086859	Rcn3	0.964065	2.79635e-05
ENSMUSG00000086859	Rfwd2	-0.980979	3.06759e-06
ENSMUSG00000086859	Rgs10	0.980444	3.37852e-06
ENSMUSG00000086859	Rpl7a	-0.972175	1.1514e-05
ENSMUSG00000086859	Rundc2a	0.957671	4.92919e-05
ENSMUSG00000086859	S100a6	0.98613	1.02082e-06
ENSMUSG00000086859	Scamp2	0.95496	6.10908e-05
ENSMUSG00000086859	Scara3	0.952981	7.08717e-05
ENSMUSG00000086859	Sccpdh	-0.957863	4.85206e-05
ENSMUSG00000086859	Scpep1	0.971916	1.18915e-05
ENSMUSG00000086859	Sdha	-0.952913	7.12278e-05
ENSMUSG00000086859	Selm	0.963131	3.05612e-05
ENSMUSG00000086859	Sephs2	-0.9716	1.23628e-05
ENSMUSG00000086859	2016-09-11	0.969425	1.59709e-05
ENSMUSG00000086859	Serpinb8	0.95074	8.32321e-05
ENSMUSG00000086859	Setd6	-0.991796	1.63348e-07
ENSMUSG00000086859	Sfrp2	0.95762	4.94975e-05
ENSMUSG00000086859	Sfrp4	0.978886	4.41175e-06
ENSMUSG00000086859	Sfxn3	0.977928	5.14773e-06
ENSMUSG00000086859	Sgcd	-0.954444	6.35426e-05
ENSMUSG00000086859	Sh3gl1	0.952907	7.12573e-05
ENSMUSG00000086859	Sirpa	0.953572	6.78401e-05
ENSMUSG00000086859	Slc16a2	0.973848	9.28353e-06
ENSMUSG00000086859	Slc18a2	0.964523	2.67476e-05
ENSMUSG00000086859	Slc27a3	0.96992	1.50919e-05
ENSMUSG00000086859	Slc43a3	0.959229	4.32945e-05
ENSMUSG00000086859	Slc44a3	-0.979207	4.18258e-06
ENSMUSG00000086859	Slc9a9	0.972732	1.07338e-05
ENSMUSG00000086859	Slit2	0.961358	3.59607e-05
ENSMUSG00000086859	Smoc2	0.957207	5.11832e-05
ENSMUSG00000086859	Snord32a	0.980711	3.22082e-06
ENSMUSG00000086859	Snx29	0.957932	4.8246e-05
ENSMUSG00000086859	Sod2	-0.95529	5.95557e-05
ENSMUSG00000086859	Sox18	0.982261	2.40581e-06
ENSMUSG00000086859	Sp100	0.961026	3.70398e-05
ENSMUSG00000086859	Srgap2	0.970128	1.47327e-05
ENSMUSG00000086859	Sstr4	0.953124	7.01289e-05
ENSMUSG00000086859	St6gal1	0.965808	2.35379e-05
ENSMUSG00000086859	Stard9	0.967666	1.93925e-05
ENSMUSG00000086859	Suclg1	-0.951592	7.83676e-05
ENSMUSG00000086859	Susd2	0.957253	5.09931e-05
ENSMUSG00000086859	Syngr2	0.954093	6.52501e-05
ENSMUSG00000086859	Sytl2	0.972307	1.1326e-05
ENSMUSG00000086859	Taok2	0.975089	7.83995e-06
ENSMUSG00000086859	Tarsl2	-0.990523	2.70333e-07
ENSMUSG00000086859	Tbc1d14	0.963045	3.08098e-05
ENSMUSG00000086859	Tbxas1	0.957828	4.86613e-05
ENSMUSG00000086859	Tcf4	0.971138	1.30747e-05
ENSMUSG00000086859	Tgoln1	-0.951212	8.05087e-05
ENSMUSG00000086859	Thbs3	0.951755	7.74611e-05
ENSMUSG00000086859	Timp3	0.974717	8.25499e-06
ENSMUSG00000086859	Tinagl1	0.952405	7.39141e-05
ENSMUSG00000086859	Tln1	0.962066	3.37301e-05
ENSMUSG00000086859	Tmem204	0.963916	2.83669e-05
ENSMUSG00000086859	Tmem214	0.95643	5.44681e-05
ENSMUSG00000086859	Tmem229b	0.950538	8.44162e-05
ENSMUSG00000086859	Tmem38b	-0.974557	8.43794e-06
ENSMUSG00000086859	Tmem45a	0.968196	1.83113e-05
ENSMUSG00000086859	Tmpo	0.972776	1.0674e-05
ENSMUSG00000086859	Tnfrsf23	-0.987824	6.48034e-07
ENSMUSG00000086859	Tnfsf10	0.956386	5.46609e-05
ENSMUSG00000086859	Tns3	0.962702	3.18126e-05
ENSMUSG00000086859	Top1	-0.951644	7.80768e-05
ENSMUSG00000086859	Tpm1	0.981462	2.80463e-06
ENSMUSG00000086859	Trim2	0.965927	2.32548e-05
ENSMUSG00000086859	Trim24	-0.950573	8.42062e-05
ENSMUSG00000086859	Trip10	0.96905	1.66615e-05
ENSMUSG00000086859	Tshz1	0.953178	6.98528e-05
ENSMUSG00000086859	Ttc14	0.964686	2.63233e-05
ENSMUSG00000086859	Ttll4	0.976654	6.25725e-06
ENSMUSG00000086859	Txnrd3	-0.981789	2.63635e-06
ENSMUSG00000086859	Uap1l1	0.959555	4.21087e-05
ENSMUSG00000086859	Ubash3b	0.959737	4.14572e-05
ENSMUSG00000086859	Unkl	0.95582	5.71528e-05
ENSMUSG00000086859	V165-D-J-C	0.979032	4.30623e-06
ENSMUSG00000086859	Vat1	0.959273	4.31341e-05
ENSMUSG00000086859	Wisp2	0.976547	6.35795e-06
ENSMUSG00000086859	Xpnpep2	0.966234	2.25356e-05
ENSMUSG00000086859	Zfp142	0.977373	5.61216e-06
ENSMUSG00000086859	Zfp521	0.957994	4.8002e-05
[truncated: 314 more rows]
